# Supplementary material for: The relationship between diet, sleep, screen time, stress coping strategies with psychological strain and athlete burnout in Chinese competitive swimmers: a cross-sectional study
Source: Research Square preprint supplement (doi:10.21203/rs.3.rs-6496771/v1), 2025-05-12
Supplement: Supplementary file 1 [file 6eb873b43570b98ae31f7e5b.docx]

# Appendix

**Table . Detailed information of the athlete subjects**

| Category | Total  N(%) | Int.Master  N(%) | Master  N(%) | First Class  N(%) | Second class  N(%) | Third Class  N(%) |
| --- | --- | --- | --- | --- | --- | --- |
| gender |  |  |  |  |  |  |
| male | 594 (55.5%) | 6 (40.0%) | 71 (59.2%) | 166 (51.7%) | 169 (57.1%) | 182 (57.1%) |
| female | 477 (44.5%) | 9 (60.0%) | 49 (40.8%) | 155 (48.3%) | 127 (42.9%) | 137 (42.9%) |
| age |  |  |  |  |  |  |
| 6 | 16 (1.5%) | |  |  |  | 16 (5.0%) |
| 7 | 48 (4.5%) | |  |  |  | 48 (15.0%) |
| 8 | 51 (4.8%) | 1 (6.7%) |  |  | 2 (0.7%) | 48 (15.0%) |
| 9 | 49 (4.6%) | |  |  | 1 (0.3%) | 48 (15.0%) |
| 10 | 74 (6.9%) | |  |  | 15 (5.1%) | 59 (18.5%) |
| 11 | 62 (5.8%) | | 1 (0.8%) | 1 (0.3%) | 21 (7.1%) | 39 (12.2%) |
| 12 | 59 (5.5%) | |  | 8 (2.5%) | 31 (10.5%) | 20 (6.3%) |
| 13 | 92 (8.6%) | | 4 (3.3%) | 23 (7.2%) | 54 (18.2%) | 11 (3.4%) |
| 14 | 79 (7.4%) | 2 (13.3%) | 5 (4.2%) | 30 (9.3%) | 36 (12.2%) | 6 (1.9%) |
| 15 | 57 (5.3%) | | 10 (8.3%) | 22 (6.9%) | 22 (7.4%) | 3 (0.9%) |
| 16 | 45 (4.2%) | | 12 (10.0%) | 24 (7.5%) | 9 (3.0%) |  |
| 17 | 42 (3.9%) | 2 (13.3%) | 8 (6.7%) | 22 (6.9%) | 9 (3.0%) | 1 (0.3%) |
| 18 | 38 (3.5%) | | 14 (11.7%) | 19 (5.9%) | 3 (1.0%) | 2 (0.6%) |
| 19 | 72 (6.7%) | 1 (6.7%) | 16 (13.3%) | 42 (13.1%) | 12 (4.1%) | 1 (0.3%) |
| 20 | 81 (7.6%) | 2 (13.3%) | 16 (13.3%) | 39 (12.1%) | 21 (7.1%) | 3 (0.9%) |
| 21 | 58 (5.4%) | 1 (6.7%) | 13 (10.8%) | 24 (7.5%) | 16 (5.4%) | 4 (1.3%) |
| 22 | 53 (4.9%) | 2 (13.3%) | 10 (8.3%) | 19 (5.9%) | 18 (6.1%) | 4 (1.3%) |
| 23 | 38 (3.5%) | 2 (13.3%) | 8 (6.7%) | 13 (4.0%) | 13 (4.4%) | 2 (0.6%) |
| 24 | 20 (1.9%) | | 2 (1.7%) | 14 (4.4%) | 4 (1.4%) |  |
| 25 | 19 (1.8%) | 1 (6.7%) |  | 10 (3.1%) | 6 (2.0%) | 2 (0.6%) |
| 26 | 18 (1.7%) | 1 (6.7%) | 1 (0.8%) | 11 (3.4%) | 3 (1.0%) | 2 (0.6%) |
| Major |  |  |  |  |  |  |
| 50m freestyle | 197 (18.4%) | 4 (26.7%) | 6 (5.0%) | 40 (12.5%) | 49 (16.6%) | 98 (30.7%) |
| 100m freestyle | 201 (18.8%) | 3 (20.0%) | 17 (14.2%) | 63 (19.6%) | 66 (22.3%) | 52 (16.3%) |
| 200m freestyle | 16 (1.5%) | 1 (6.7%) | 3 (2.5%) | 6 (1.9%) | 1 (0.3%) | 5 (1.6%) |
| 400m freestyle | 49 (4.6%) | | 10 (8.3%) | 13 (4.0%) | 14 (4.7%) | 12 (3.8%) |
| 800m freestyle | 16 (1.5%) | | 2 (1.7%) | 12 (3.7%) | 2 (0.7%) |  |
| 1500m freestyle | 29 (2.7%) | 1 (6.7%) | 6 (5.0%) | 16 (5.0%) | 4 (1.4%) | 2 (0.6%) |
| 50m backstroke | 63 (5.9%) | | 10 (8.3%) | 13 (4.0%) | 18 (6.1%) | 22 (6.9%) |
| 100m backstroke | 64 (6.0%) | 4 (26.7%) | 11 (9.2%) | 20 (6.2%) | 21 (7.1%) | 8 (2.5%) |
| 200m backstroke | 23 (2.1%) | | 8 (6.7%) | 8 (2.5%) | 5 (1.7%) | 2 (0.6%) |
| 50m breaststroke | 87 (8.1%) | | 5 (4.2%) | 15 (4.7%) | 33 (11.1%) | 34 (10.7%) |
| 100m breaststroke | 157 (14.7%) | 1 (6.7%) | 17 (14.2%) | 55 (17.1%) | 32 (10.8%) | 52 (16.3%) |
| 200m breaststroke | 25 (2.3%) | 1 (6.7%) | 7 (5.8%) | 11 (3.4%) | 2 (0.7%) | 4 (1.3%) |
| 50m butterfly | 30 (2.8%) | | 4 (3.3%) | 7 (2.2%) | 9 (3.0%) | 10 (3.1%) |
| 100m butterfly | 72 (6.7%) | | 7 (5.8%) | 23 (7.2%) | 28 (9.5%) | 14 (4.4%) |
| 200m butterfly | 14 (1.3%) | | 3 (2.5%) | 5 (1.6%) | 5 (1.7%) | 1 (0.3%) |
| 200m individual medley | 15 (1.4%) | | 2 (1.7%) | 8 (2.5%) | 3 (1.0%) | 2 (0.6%) |
| 400m individual medley | 13 (1.2%) | | 2 (1.7%) | 6 (1.9%) | 4 (1.4%) | 1 (0.3%) |

Note: The figures in parentheses represent the proportion of athletes in the total sample size
