# Supplementary material for: The relationship between diet, sleep, screen time, stress coping strategies with psychological strain and athlete burnout in Chinese competitive swimmers: a cross-sectional study
Source: Research Square preprint supplement (doi:10.21203/rs.3.rs-6496771/v1), 2025-05-12
Supplement: Supplementary file 2 [file c6f4e6a07d028b445d60f65a.xlsx]

## Sheet: Raw data
index	Age	Gender	Height	Weight	BMI	Athlete_Grade	Sports_Specific	Training_years	Brief_ED_in_Athletes_Score(BEDA)	Athlete_Sleep_Screening_Score(ASSQ)	Screen_Time	Athlete_Psychological_Strain_Score(APSQ)	Athlete_Psychological_Strain_Self-regulation_difficulties(APSQ_SRD)	Athlete_Psychological_Strain__Performance_concerns(APSQ_PC)	Athlete_Psychological_Strain__Externalised_coping(APSQ_EC)	Coping_Scale_for_Chinese_athletes(CSCA)	Coping_Scale_for_Chinese_athletes_Problem-focused_coping(CSCA_PC)	Coping_Scale_for_Chinese_athletes_Emotion-focused_coping(CSCA_EC)	Coping_Scale_for_Chinese_athletes_Avoidance_coping(CSCA_AC)	Coping_Scale_for_Chinese_athletes_Transcendence_coping(CSCA_TC)	Athlete_Burnout_score(ABQ)	Athlete_Burnout_Reduced_Sense_of_Achievement(ABQ_RSA)	Athlete_Burnout_Physical_and_Emotional_exhaustion(ABQ_PEE)	Athlete_Burnout_Devaluation_of_Sports_Practice(ABQ_DSP)
137	15	1	173	58	19.4	4	2	2	4	3	2	20	6	12	2	88	24	23	22	19	21	8	8	5
118	15	1	180	55	17	4	2	2	8	4	4	10	4	4	2	108	30	30	26	22	8	3	4	1
132	15	1	173	58	19.4	4	2	2	2	3	2	23	6	15	2	83	26	22	17	18	11	3	7	1
112	15	1	180	55	17	4	2	2	7	1	4	10	4	4	2	101	30	30	19	22	10	7	3	0
308	13	1	160	32	12.5	4	8	2	6	3	2	10	4	4	2	120	30	30	30	30	48	12	20	16
111	8	2	135	25	13.7	5	7	1	3	2	0.5	10	4	4	2	96	24	24	24	24	11	9	0	2
133	10	1	148	34	15.5	5	7	1	0	2	2	10	4	4	2	90	24	22	23	21	29	9	10	10
132	10	2	136	32	17.3	5	2	1	1	3	0.5	19	9	8	2	80	20	19	24	17	19	8	5	6
102	9	1	144	35	16.9	5	10	1	6	2	0.5	10	4	4	2	24	6	6	6	6	8	8	0	0
146	8	1	139	31	16	5	1	1	6	2	1	16	4	10	2	99	25	25	28	21	32	8	12	12
127	10	1	150	36	16	5	10	1	2	2	0.5	18	5	11	2	120	30	30	30	30	13	6	2	5
110	10	1	141	66	33.2	5	1	1	3	4	0.5	10	4	4	2	120	30	30	30	30	8	4	0	4
130	10	2	150	28	12.4	5	4	1	4	1	0.5	16	4	10	2	118	30	30	30	28	16	5	3	8
58	8	1	140	29	14.8	5	1	1	8	1	2	10	4	4	2	24	6	6	6	6	26	12	6	8
102	10	1	151	40	17.5	5	10	1	4	1	0.5	10	4	4	2	24	6	6	6	6	8	8	0	0
119	15	2	175	60	19.6	3	11	2	3	3	4	17	6	9	2	82	25	24	16	17	4	2	2	0
123	9	1	152	42	18.2	5	1	1	7	1	1	13	4	7	2	120	30	30	30	30	10	3	3	4
113	9	1	137	31	16.5	5	13	1	4	2	2	10	4	4	2	120	30	30	30	30	11	7	0	4
121	10	2	155	40	16.6	4	1	1	4	3	0.5	23	8	13	2	91	30	19	24	18	6	5	1	0
116	10	1	145	38	18.1	5	11	1	2	1	1	10	4	4	2	48	6	22	6	14	6	1	3	2
113	7	1	132	30	17.2	5	13	1	5	1	0.5	10	4	4	2	96	24	24	24	24	5	2	2	1
135	16	2	167.5	55	19.6	3	2	2	11	7	1	21	8	11	2	74	21	24	18	11	29	11	12	6
145	10	2	148	39	17.8	5	13	1	1	1	1	26	8	12	6	61	16	14	15	16	27	10	8	9
121	11	1	152	40	17.3	5	1	1	1	4	7	10	4	4	2	96	24	24	24	24	15	7	4	4
139	7	2	133	32	18.1	5	1	1	4	0	1	20	9	8	3	84	21	22	21	20	23	9	7	7
122	7	2	136	32	17.3	5	1	1	1	2	2	14	4	8	2	113	26	30	27	30	16	10	3	3
268	6	1	126	23	14.5	5	1	1	4	0	1	10	4	4	2	117	30	30	27	30	15	9	3	3
115	7	2	132	29	16.6	5	1	1	6	0	0.5	10	4	4	2	108	30	30	26	22	5	0	1	4
115	7	1	126	26	16.4	5	1	1	1	1	0.5	15	7	6	2	78	22	18	19	19	30	10	10	10
112	6	1	130	25	14.8	5	2	1	6	1	0.5	10	4	4	2	109	30	29	22	28	2	0	2	0
109	8	1	130	25	14.8	5	1	1	0	0	1	10	4	4	2	88	18	24	22	24	5	3	1	1
122	12	1	155	47.5	19.8	5	1	1	0	1	0.5	13	5	6	2	88	22	23	23	20	17	7	5	5
113	7	1	124	23	15	5	13	1	6	4	1	13	6	5	2	71	20	22	15	14	4	4	0	0
139	7	1	140	30	15.3	5	1	1	4	2	1	26	12	12	2	80	22	19	20	19	19	8	5	6
119	13	1	160	44	17.2	5	11	2	0	1	0.5	10	4	4	2	112	30	30	26	26	9	4	1	4
194	13	2	180	62	19.1	3	6	2	6	5	2	23	8	13	2	81	21	21	21	18	24	7	8	9
121	14	1	176	60	19.4	5	1	1	2	5	0.5	12	4	6	2	85	22	22	22	19	17	9	4	4
106	7	1	140	25	12.8	5	1	1	3	2	0.5	10	4	4	2	111	30	30	27	24	4	4	0	0
125	7	2	125	26	16.6	5	1	1	4	2	0.5	13	4	7	2	78	23	21	17	17	16	7	5	4
212	12	2	161	55	21.2	3	12	2	1	3	0.5	16	7	7	2	107	24	30	27	26	14	2	4	8
132	7	2	135	24	13.2	5	2	1	2	2	1	10	4	4	2	80	18	20	20	22	30	10	10	10
144	13	1	159	44	17.4	5	9	2	2	6	0.5	28	10	12	6	67	14	19	13	21	28	13	8	7
241	13	2	167	50	17.9	3	6	2	3	6	4	21	7	12	2	79	20	21	20	18	22	10	7	5
128	12	2	171	48.5	16.6	4	2	1	0	4	0	18	6	10	2	90	24	24	20	22	15	7	2	6
122	8	1	152	42	18.2	5	1	1	5	2	0.5	13	4	7	2	90	30	24	17	19	9	3	3	3
257	12	2	155	90	37.5	5	2	1	11	4	0.5	21	4	15	2	112	30	30	26	26	26	6	10	10
132	7	1	128	25	15.3	5	2	1	0	3	0.5	17	7	8	2	80	20	23	19	18	21	9	7	5
126	14	1	181	60	18.3	1	8	2	9	4	1	19	6	9	4	50	13	12	12	13	19	9	5	5
195	13	2	165	60	22	4	2	2	18	6	3	48	18	20	10	120	30	30	30	30	51	14	18	19
107	12	1	160	42.5	16.6	5	7	1	10	3	0.5	11	4	5	2	101	26	28	26	21	11	8	1	2
141	8	2	120	37	25.7	5	1	1	9	1	0.5	19	7	10	2	114	28	29	27	30	30	10	10	10
160	13	1	164	55	20.4	5	2	1	4	8	0.5	37	19	16	2	55	9	11	16	19	49	20	13	16
119	14	1	175	58	18.9	5	11	1	4	7	1	19	10	7	2	69	23	24	12	10	11	4	5	2
115	14	1	168.5	59	20.8	4	1	1	0	2	0.5	10	4	4	2	118	28	30	30	30	9	3	4	2
118	8	2	149	31	14	4	2	2	3	1	0.5	10	4	4	2	75	23	21	19	12	14	7	4	3
143	20	2	173	61	20.4	3	11	3	0	3	4	22	11	9	2	94	24	24	23	23	29	10	10	9
121	12	1	164	54	20.1	4	1	2	1	2	0.5	16	8	6	2	87	24	24	20	19	9	4	4	1
277	13	2	159	49	19.4	4	2	2	5	6	2	17	6	9	2	72	18	18	18	18	16	8	5	3
112	12	2	165	47	17.3	3	2	2	2	3	0.5	10	4	4	2	81	22	28	15	16	10	7	2	1
131	20	2	170	60	20.8	3	11	3	3	7	4	21	9	10	2	84	22	21	21	20	29	10	9	10
108	12	2	170	55	19	3	11	2	2	2	0.5	11	4	5	2	82	30	19	19	14	11	11	0	0
115	12	1	160	42	16.4	4	1	2	4	0	1	10	4	4	2	120	30	30	30	30	7	3	2	2
117	12	2	156	38	15.6	4	14	2	2	4	1	14	6	6	2	79	23	20	15	21	12	6	4	2
157	20	1	180	75	23.1	3	3	3	3	2	1	20	8	8	4	92	21	24	23	24	41	11	15	15
133	11	2	147	30	13.9	4	7	2	9	1	1	10	4	4	2	24	6	6	6	6	23	6	9	8
132	11	1	158	45	18	5	2	2	3	1	1	17	8	7	2	72	18	18	18	18	19	7	6	6
236	10	1	163	40	15.1	4	11	2	4	5	0.5	21	8	10	3	94	28	23	21	22	20	6	8	6
124	11	1	166	44	16	5	11	1	0	1	0.5	10	4	4	2	96	24	24	24	24	16	5	7	4
269	12	1	155	40	16.6	4	7	2	3	2	3	18	6	10	2	80	19	26	21	14	9	8	1	0
188	13	2	161	55	21.2	3	14	2	7	8	1	30	12	12	6	72	18	18	18	18	30	10	10	10
208	13	2	169	46	16.1	3	8	2	4	3	2	24	9	13	2	89	21	24	21	23	25	6	11	8
169	21	1	181	73	22.3	3	1	3	7	3	7	32	20	8	4	120	30	30	30	30	41	11	15	15
133	16	1	184	79	23.3	3	7	2	11	3	2	23	6	15	2	78	24	20	20	14	14	5	5	4
244	13	2	166	60	21.8	3	5	2	2	3	1	19	7	10	2	112	27	29	27	29	12	5	6	1
228	13	1	174	51	16.8	4	4	1	4	3	0.5	18	9	7	2	81	19	20	18	24	34	11	12	11
229	13	2	178	62	19.6	3	14	2	8	7	2	29	11	16	2	65	14	18	15	18	27	11	11	5
135	17	1	190	68	18.8	3	2	2	8	5	3	20	7	11	2	96	24	27	23	22	17	7	8	2
138	12	2	152	38	16.4	5	14	2	4	2	0.5	20	8	9	3	92	23	24	23	22	22	9	6	7
214	13	1	161	41	15.8	4	9	2	6	4	0.5	23	9	12	2	85	19	27	21	18	25	10	7	8
221	13	2	178	62	19.6	3	14	2	10	8	2	30	12	12	6	72	18	18	18	18	30	10	10	10
216	13	1	172	54	18.3	3	4	2	4	5	0.5	24	9	12	3	85	21	23	19	22	27	6	15	6
254	13	2	156	46	18.9	4	14	2	4	4	2	27	11	14	2	75	21	19	18	17	26	8	8	10
121	23	1	184	80	23.6	1	1	3	2	8	7	17	6	9	2	85	20	23	23	19	20	8	4	8
220	11	2	158	46	18.4	5	2	2	7	6	1	18	6	10	2	102	27	30	27	18	10	7	2	1
211	13	1	172	56	18.9	4	11	2	1	10	0	23	9	11	3	74	18	18	19	19	30	10	10	10
228	13	2	150	40	17.8	4	4	2	9	5	1	20	8	10	2	77	18	22	15	22	28	13	9	6
251	13	2	170	56	19.4	3	1	2	3	4	3	25	10	13	2	82	22	24	20	16	23	7	10	6
241	13	1	180	64.1	19.8	4	6	2	8	6	1	16	4	10	2	108	26	30	26	26	14	5	7	2
127	11	1	150	37	16.4	5	10	1	2	3	0.5	16	6	8	2	91	22	23	24	22	15	7	5	3
203	13	2	165	50	18.4	4	11	2	0	1	1	20	8	10	2	92	24	24	22	22	16	7	5	4
112	9	2	145	34	16.2	5	2	1	9	2	0.5	12	6	4	2	110	30	30	26	24	0	0	0	0
150	14	2	171	55.5	19	3	17	2	14	6	4	31	13	14	4	87	18	27	24	18	35	12	10	13
149	16	2	176	63	20.3	3	11	1	6	5	3	28	14	10	4	85	22	25	18	20	31	11	11	9
131	14	2	170	56	19.4	2	11	2	4	4	4	21	8	11	2	75	18	22	17	18	19	8	6	5
164	13	2	165	60	22	4	14	2	1	4	1	26	12	12	2	72	18	18	18	18	32	12	10	10
216	13	2	167	49	17.6	2	4	2	7	6	0.5	20	8	8	4	96	24	24	24	24	19	6	10	3
116	12	1	156	45	18.5	4	11	2	4	2	1	10	4	4	2	120	30	30	30	30	8	4	1	3
234	13	2	167	54	19.4	4	11	2	10	4	0.5	17	7	8	2	81	21	24	19	17	16	5	8	3
275	13	2	159	47	18.6	2	15	2	8	9	1	16	5	9	2	120	30	30	30	30	9	0	5	4
134	12	1	170	46	15.9	4	8	2	0	1	0.5	19	8	9	2	91	21	24	23	23	19	7	6	6
128	11	2	149	32	14.4	5	2	1	9	2	2	19	9	8	2	96	24	24	24	24	17	11	4	2
135	11	1	162	50	19.1	5	2	2	1	6	0.5	17	8	7	2	118	28	30	30	30	24	10	8	6
145	11	2	145	35	16.6	4	13	2	3	5	2	23	7	14	2	69	16	18	17	18	30	10	10	10
236	13	2	170	57	19.7	2	11	2	9	8	0	26	10	14	2	81	15	21	22	23	36	10	18	8
122	17	1	182	65	19.6	4	1	2	3	6	2	21	8	11	2	86	17	23	24	22	15	7	3	5
119	11	2	156	46	18.9	2	11	1	3	4	0.5	15	4	9	2	87	27	27	18	15	6	2	2	2
252	14	1	175	63	20.6	5	3	1	2	3	1	16	4	10	2	114	30	29	28	27	15	3	8	4
228	14	2	169	57	20	3	4	2	5	7	2	18	9	7	2	87	25	24	19	19	10	6	2	2
135	22	1	175	70	22.9	4	2	3	6	8	5	20	8	8	4	97	30	27	22	18	15	3	5	7
134	20	1	180	68	21	3	8	3	5	5	5	18	7	9	2	85	23	27	18	17	18	6	5	7
240	14	1	176	60	19.4	4	12	2	3	5	0.5	16	6	8	2	79	24	23	19	13	14	3	8	3
117	20	1	183	81	24.2	3	14	3	0	3	7	13	4	7	2	106	30	27	28	21	15	5	4	6
127	11	1	160	40	15.6	5	10	2	0	3	0	18	8	8	2	88	20	22	25	21	15	10	2	3
256	14	1	188	72	20.4	3	2	2	6	1	0.5	10	4	4	2	96	30	24	24	18	2	0	0	2
118	17	2	175	65	21.2	2	2	3	8	5	2	21	9	10	2	99	28	22	23	26	0	0	0	0
120	11	2	165	49	18	4	2	2	10	1	0.5	12	5	5	2	60	12	17	14	17	18	10	7	1
142	18	1	185	83	24.3	4	2	2	7	0	7	20	7	8	5	72	18	18	18	18	30	10	10	10
258	14	2	172	65	22	3	14	2	6	9	3	30	11	16	3	69	13	18	19	19	38	15	13	10
242	14	1	187	69.4	19.8	3	6	2	7	10	2	31	11	18	2	72	20	23	10	19	52	17	16	19
197	22	1	180	75	23.1	5	12	1	3	9	7	50	20	20	10	104	25	25	26	28	49	12	19	18
157	23	2	165	55	20.2	4	3	2	6	3	4	24	6	15	3	94	24	24	24	22	43	12	16	15
266	14	1	171.5	51.5	17.5	4	10	2	6	5	0.5	31	12	17	2	96	24	28	24	20	31	10	14	7
119	13	1	173	50	16.7	4	11	2	5	2	1	12	4	6	2	77	24	20	17	16	9	2	4	3
227	14	2	165	50.9	18.7	3	8	2	6	2	1	16	4	10	2	105	30	30	26	19	24	5	12	7
210	14	1	178	80	25.2	4	4	2	9	6	4	36	11	20	5	76	21	17	17	21	48	17	20	11
145	22	2	171	64	21.9	3	13	2	8	4	7	34	16	15	3	119	29	30	30	30	24	6	8	10
276	14	1	164	50	18.6	4	10	3	9	6	0.5	16	7	7	2	88	24	26	22	16	15	8	5	2
147	21	1	182	75	22.6	3	2	3	1	7	3	20	8	8	4	95	24	24	24	23	41	11	15	15
143	26	1	175	75	24.5	5	11	2	8	9	2	30	10	13	7	88	25	28	23	12	21	5	7	9
177	12	1	155	50	20.8	5	10	1	6	8	1	40	16	16	8	96	24	24	24	24	41	11	15	15
36	17	1	175	60	19.6	5	11	2	13	4	4	10	4	4	2	32	6	8	8	10	8	8	0	0
121	10	1	145	36	17.1	5	1	1	3	4	0	14	6	6	2	78	20	25	15	18	9	4	2	3
162	9	2	138	45	23.6	5	1	1	3	3	0	10	4	4	2	120	30	30	30	30	52	12	20	20
130	12	1	156	41	16.8	4	4	2	0	5	1	20	7	9	4	65	15	18	17	15	16	4	7	5
251	11	2	146	37	17.4	5	1	2	11	2	2	24	11	10	3	94	23	25	23	23	32	13	8	11
266	14	2	174	58	19.2	3	10	2	8	6	2	34	17	15	2	68	20	13	19	16	32	10	16	6
144	26	1	173	70	23.4	4	9	2	6	7	2	14	4	8	2	120	30	30	30	30	36	8	15	13
136	23	1	177	60	19.2	4	10	3	1	3	0.5	14	7	5	2	72	18	18	18	18	30	10	10	10
117	25	1	178	75	23.7	3	14	2	2	5	6	10	4	4	2	66	18	17	16	15	19	9	5	5
138	25	2	161	52	20.1	4	14	3	14	4	4	23	7	13	3	96	21	24	25	26	23	8	10	5
231	14	1	185	70	20.5	4	11	2	3	2	2	10	4	4	2	104	30	30	26	18	10	2	3	5
102	26	1	185	70	20.5	3	10	2	3	4	3	10	4	4	2	24	6	6	6	6	8	8	0	0
136	22	2	168	66	23.4	4	10	3	1	5	3	24	11	10	3	83	18	23	20	22	19	6	7	6
130	14	2	172	51	17.2	3	4	2	6	4	1	14	5	7	2	82	23	22	23	14	20	6	8	6
142	23	1	172	70	23.7	4	2	2	7	3	3	21	10	9	2	84	20	25	23	16	27	8	11	8
253	14	1	173	62	20.7	3	11	1	6	7	3	27	10	15	2	73	20	30	10	13	22	13	9	0
94	24	1	180	97.5	30.1	3	12	3	16	3	7	10	4	4	2	92	22	26	14	30	16	4	8	4
239	14	2	171.5	60	20.4	3	14	2	0	6	0	39	20	16	3	60	15	11	20	14	49	16	15	18
229	12	1	154	40	16.9	5	14	1	3	1	4	10	4	4	2	104	24	30	24	26	8	4	4	0
124	25	1	180	90	27.8	3	11	3	2	5	7	20	8	8	4	96	24	24	24	24	32	9	12	11
166	22	1	170	62	21.5	5	10	1	3	7	3	14	4	8	2	104	18	30	26	30	52	12	20	20
130	25	2	171	72	24.6	4	4	2	3	5	4	28	11	13	4	74	19	19	18	18	18	4	8	6
160	24	1	180	80	24.7	4	2	2	3	4	3	30	12	12	6	91	23	22	24	22	38	12	12	14
256	14	2	174	57	18.8	3	2	2	1	6	2	20	7	11	2	104	24	27	28	25	24	9	6	9
125	16	1	183	65	19.4	4	1	1	7	7	5	21	9	10	2	61	15	18	18	10	20	11	7	2
231	14	1	173	70	23.4	4	11	1	13	3	0.5	15	7	6	2	89	24	23	25	17	17	6	6	5
129	10	2	150	40	17.8	5	10	1	10	3	0.5	19	8	9	2	52	14	12	15	11	16	6	5	5
138	22	1	167	61	21.9	4	14	2	1	9	4	20	8	8	4	72	18	18	18	18	30	10	10	10
243	14	2	169	52	18.2	3	2	2	4	4	3	23	10	11	2	66	19	18	13	16	28	11	8	9
123	16	1	181	64	19.5	3	1	2	1	3	1	10	4	4	2	120	30	30	30	30	15	3	7	5
138	23	2	160	53	20.7	4	14	3	2	5	4	25	13	10	2	84	18	24	21	21	36	11	12	13
133	12	2	158	47	18.8	4	7	1	2	7	1	20	9	9	2	85	23	24	21	17	17	5	5	7
128	10	1	163	58	21.8	5	2	1	7	6	0.5	23	11	9	3	84	18	21	21	24	24	9	8	7
220	14	1	170	58	20.1	4	2	2	1	5	2	17	8	7	2	86	24	20	22	20	24	7	8	9
125	24	2	158	58	23.2	4	1	2	2	8	7	17	6	8	3	100	26	26	28	20	21	6	7	8
149	22	1	186	87	25.1	4	11	2	7	2	3	26	10	14	2	77	21	19	19	18	31	11	11	9
111	21	1	168	60	21.3	4	7	2	1	6	6	15	7	5	3	92	26	24	24	18	19	8	5	6
143	21	1	176	90	29.1	4	11	3	8	1	7	10	4	4	2	103	26	29	27	21	39	13	12	14
125	13	1	182	75	22.6	4	1	1	2	2	1	18	7	9	2	87	24	23	21	19	11	4	4	3
137	10	1	140	33.5	17.1	5	2	1	5	2	1	22	10	10	2	88	24	22	23	19	21	9	5	7
122	14	1	186	72	20.8	4	1	1	5	3	1	18	6	10	2	94	29	30	19	16	6	2	3	1
235	14	2	168	51	18.1	4	8	1	1	1	2	10	4	4	2	120	30	30	30	30	12	5	5	2
143	24	1	172	76	25.7	3	11	3	8	11	7	26	12	9	5	74	18	21	19	16	32	10	11	11
254	14	2	163	54	20.3	4	14	2	2	4	2	25	11	12	2	77	19	18	19	21	26	8	8	10
141	25	2	170	70	24.2	1	1	3	15	5	6	26	12	12	2	80	18	23	20	19	23	8	8	7
128	24	2	161	42	16.2	4	2	3	0	4	5	14	8	4	2	60	18	13	16	13	24	9	7	8
131	22	1	175	70	22.9	4	11	2	2	8	2	12	4	6	2	96	24	24	24	24	25	10	5	10
143	22	1	173	60	20	3	11	3	4	3	2	22	7	10	5	88	24	23	21	20	29	11	10	8
220	14	1	177	57	18.2	4	2	2	2	3	6	15	5	8	2	91	27	24	18	22	19	9	5	5
238	14	2	176	66	21.3	2	8	2	13	12	3	33	17	14	2	75	16	22	22	15	34	11	14	9
172	14	1	172	60	20.3	4	14	2	2	5	0.5	18	8	8	2	94	24	24	24	22	30	10	10	10
128	25	1	164	76	28.3	4	2	3	14	5	4	10	4	4	2	24	6	6	6	6	30	13	8	9
238	14	2	172	56	18.9	2	8	2	4	7	1	21	8	11	2	83	17	24	22	20	37	13	13	11
124	10	1	150	36	16	5	11	1	0	1	0.5	16	6	8	2	73	24	20	16	13	10	4	3	3
152	23	1	175	50	16.3	5	1	1	5	0	3	24	12	8	4	72	18	18	18	18	41	11	15	15
217	14	2	180	66	20.4	1	6	2	7	3	4	22	8	12	2	84	15	26	21	22	19	8	4	7
126	24	1	188	75	21.2	3	8	2	1	6	7	25	10	11	4	57	12	14	12	19	49	17	15	17
136	21	2	168	62	22	4	10	2	11	8	5	22	9	11	2	90	22	24	24	20	22	6	11	5
128	14	1	171	57	19.5	4	2	2	3	7	2	16	7	7	2	72	18	18	17	19	14	1	8	5
142	21	2	170	58	20.1	4	2	3	14	9	3	24	10	12	2	74	17	19	21	17	31	10	10	11
206	14	2	163	54	20.3	3	15	2	1	7	4	18	7	9	2	74	20	18	19	17	16	6	6	4
147	13	2	164	52	19.3	4	2	2	7	4	2	19	10	7	2	88	14	24	21	29	34	9	14	11
132	20	2	163	56	21.1	4	2	2	4	6	4	20	9	9	2	74	20	18	19	17	35	8	12	15
255	14	1	180	70	21.6	3	11	2	6	2	0.5	20	8	10	2	97	27	28	19	23	22	8	12	2
120	11	1	145	28	13.3	5	2	1	6	4	1	15	7	6	2	98	26	29	21	22	7	6	0	1
144	25	2	165	60	22	3	9	3	1	3	7	24	12	8	4	72	18	18	18	18	29	9	10	10
140	17	2	168	52	18.4	3	4	2	6	4	6	25	9	14	2	94	21	30	16	27	17	6	11	0
132	26	1	182	73	22	3	2	2	1	11	6	21	8	11	2	59	17	14	14	14	24	7	10	7
155	16	2	172	60	20.3	3	11	3	6	3	2	27	11	13	3	104	30	29	24	21	34	14	16	4
130	19	2	170	61	21.1	3	4	3	3	8	6	20	8	10	2	83	22	21	20	20	24	10	8	6
254	15	1	176	65	21	4	14	2	3	6	2	17	4	11	2	90	26	24	23	17	21	9	6	6
120	26	1	183	80	23.9	3	2	3	3	4	1	12	6	4	2	81	19	24	20	18	23	7	8	8
137	15	2	168	57	20.2	3	2	2	5	7	6	22	7	13	2	58	12	17	16	13	24	12	9	3
203	15	1	183	74	22.1	2	11	3	1	8	5	34	16	15	3	88	18	20	27	23	32	10	12	10
146	26	1	185	90	26.3	3	1	2	2	9	5	31	15	11	5	52	14	12	13	13	34	11	12	11
153	18	2	166	54	19.6	3	5	3	2	7	5	20	8	8	4	93	22	24	24	23	37	9	15	13
210	15	1	182	68	20.5	3	4	2	2	4	3	20	8	8	4	77	20	19	21	17	26	10	8	8
136	23	2	165	52	19.1	4	10	3	13	10	7	17	9	6	2	96	24	25	23	24	23	5	8	10
122	10	2	132	25	14.3	4	1	1	4	2	1	14	5	7	2	97	24	26	24	23	10	5	2	3
151	20	2	178	65	20.5	3	8	3	10	9	7	20	8	8	4	68	15	18	17	18	41	15	11	15
114	10	2	140	31	15.8	4	7	2	2	1	1	10	4	4	2	120	30	30	30	30	6	2	1	3
120	12	2	164	46	17.1	3	2	2	0	2	3	21	10	9	2	72	16	18	19	19	24	9	8	7
117	13	2	166	49.5	18	4	14	2	2	1	0.5	10	4	4	2	105	29	28	24	24	9	4	1	4
133	26	2	162	52	19.8	3	7	3	1	7	6	19	9	7	3	74	24	21	14	15	20	5	8	7
268	15	2	167	60	21.5	3	1	2	12	9	6	27	11	14	2	90	25	27	20	18	28	14	10	4
126	13	2	169	50	17.5	4	8	2	0	1	0.5	10	4	4	2	120	30	30	30	30	16	4	5	7
146	22	1	180	80	24.7	3	1	3	14	11	7	35	15	18	2	82	21	24	14	23	33	12	9	12
165	25	1	178	80	25.2	5	1	2	2	5	4	44	17	18	9	107	27	26	25	29	43	11	16	16
122	10	1	157	40	16.2	4	1	2	3	3	1	12	4	6	2	116	30	29	30	27	14	5	6	3
141	21	2	183	70	20.9	1	1	3	2	12	1	36	15	14	7	85	21	22	21	21	29	9	10	10
142	22	1	178	70	22.1	4	2	3	6	4	6	10	4	4	2	102	20	30	30	22	40	8	16	16
135	26	2	175	66.5	21.7	3	2	3	2	8	4	16	8	6	2	104	21	30	25	28	25	8	9	8
150	12	2	152	40	17.3	3	17	2	1	4	1	23	9	12	2	75	21	21	15	18	38	11	15	12
211	15	2	160	45	17.6	5	11	2	3	3	0.5	11	5	4	2	75	19	18	20	18	30	10	10	10
232	15	1	176	68	22	3	11	3	15	6	1	23	7	13	3	89	24	23	22	20	27	10	13	4
268	15	1	183	76	22.7	3	1	2	3	3	2	23	10	11	2	86	23	23	21	19	29	8	13	8
233	15	2	175	57.5	18.8	3	1	2	3	6	5	20	8	10	2	75	26	18	15	16	27	12	13	2
124	24	2	174	60	19.8	3	11	3	1	4	2	30	12	12	6	48	12	12	12	12	30	10	10	10
215	15	2	169	52	18.2	3	11	2	6	7	0	25	11	12	2	67	19	13	20	15	39	15	16	8
129	11	1	158	40	16	5	10	1	3	0	0.5	19	8	9	2	92	24	24	22	22	18	10	4	4
119	26	1	190	97	26.9	3	11	3	3	5	3	23	10	11	2	82	20	19	21	22	36	14	12	10
116	12	2	159	46	18.2	5	11	2	4	0	0.5	13	4	7	2	89	29	22	21	17	8	5	3	0
191	15	1	185	72	21	3	12	1	5	3	2	22	9	11	2	80	22	19	23	16	28	7	14	7
120	23	2	165	62	22.8	4	2	3	7	4	1	20	8	8	4	64	12	18	17	17	30	10	10	10
113	13	1	169	53.1	18.6	4	13	1	3	8	2	30	12	12	6	72	18	18	18	18	24	9	10	5
118	14	1	187	64	18.3	4	2	2	1	5	2	12	4	6	2	77	24	24	17	12	19	11	4	4
135	19	2	180	64	19.8	2	2	2	10	5	3	26	12	12	2	75	19	17	21	18	42	14	16	12
136	14	1	170	54.8	19	3	10	2	3	3	3	17	7	8	2	75	16	23	19	17	29	12	8	9
229	15	1	180	52	16	3	14	2	5	4	1	24	11	11	2	68	19	19	18	12	23	7	10	6
222	15	2	171	58	19.8	3	17	3	2	6	2	20	8	10	2	79	18	22	20	19	21	7	8	6
106	17	2	178	67	21.1	1	1	2	0	9	4	22	9	11	2	74	18	19	20	17	23	10	7	6
248	15	1	188	72	20.4	2	8	2	5	3	5	19	5	12	2	94	26	28	21	19	20	6	7	7
235	15	2	170	62	21.5	3	8	2	3	10	4	30	14	12	4	72	18	18	18	18	30	10	10	10
216	15	2	179	56	17.5	2	4	3	9	3	2	30	13	15	2	82	22	22	23	15	29	6	16	7
284	15	2	171	62	21.2	2	14	2	8	6	2	29	8	19	2	89	25	23	23	18	38	15	12	11
236	15	1	190	75	20.8	2	11	2	5	6	1	17	4	11	2	103	26	30	26	21	14	6	4	4
124	12	1	162	47	17.9	4	11	2	0	3	0.5	17	7	8	2	78	24	22	19	13	9	3	3	3
134	19	1	183	74	22.1	2	8	2	1	9	7	30	12	12	6	72	18	18	18	18	41	11	15	15
131	12	1	161	55	21.2	5	11	1	4	3	1	10	4	4	2	106	30	25	26	25	25	5	9	11
225	16	2	172	59	19.9	3	11	2	5	2	4	18	5	11	2	82	22	26	16	18	12	3	5	4
225	16	1	183	76	22.7	2	11	2	2	6	3	20	6	12	2	100	29	28	25	18	32	11	13	8
114	15	1	193	75	20.1	2	7	2	2	7	5	19	8	9	2	72	14	23	17	18	22	5	8	9
110	15	2	168	63	22.3	2	1	3	7	3	2	15	9	4	2	102	30	27	25	20	2	0	2	0
124	17	1	171	70	23.9	2	11	2	5	5	2	26	8	15	3	108	28	29	28	23	23	7	7	9
146	23	1	179	92	28.7	4	1	2	10	8	4	25	8	14	3	85	25	19	23	18	38	13	11	14
231	16	2	168	65	23	3	11	3	0	1	2	10	4	4	2	95	30	26	23	16	10	5	2	3
124	13	2	170	60	20.8	3	11	2	4	4	2	17	4	11	2	110	27	28	28	27	11	4	5	2
210	16	2	170	57.5	19.9	2	4	2	4	4	3	25	10	13	2	79	21	22	19	17	31	13	10	8
113	15	2	165	55	20.2	3	13	2	2	7	5	13	4	7	2	91	24	23	22	22	20	8	5	7
129	13	1	168.5	50	17.6	5	10	1	6	4	1	18	7	9	2	103	25	29	23	26	11	3	5	3
278	16	2	172	58	19.6	3	2	2	9	12	4	33	14	17	2	60	20	14	13	13	37	14	13	10
115	13	2	165	50	18.4	3	1	2	3	5	3	14	5	7	2	118	28	30	30	30	5	3	2	0
168	16	2	168	58	20.5	3	5	2	2	0	2	17	5	10	2	75	19	23	19	14	11	6	3	2
211	16	1	177	63	20.1	3	11	2	3	5	5	27	11	11	5	76	18	19	21	18	27	8	10	9
228	16	1	185	68	19.9	3	4	2	7	4	5	21	6	13	2	80	22	23	16	19	23	7	12	4
247	16	1	180	67	20.7	3	6	2	4	4	3	21	9	9	3	68	16	19	22	11	22	11	7	4
214	16	1	184	75	22.2	3	9	2	6	3	4	16	5	9	2	92	29	23	15	25	6	3	3	0
224	16	1	184	74	21.9	2	6	2	6	8	3	21	6	13	2	93	24	24	24	21	21	7	13	1
116	14	2	175	63.5	20.7	3	11	2	2	0	5	15	7	6	2	102	27	27	26	22	14	8	3	3
194	16	2	166	54	19.6	2	6	2	7	4	5	21	7	12	2	85	19	26	20	20	23	7	8	8
111	18	1	185	90	26.3	2	7	3	18	4	3	10	4	4	2	114	30	30	28	26	11	8	3	0
250	16	1	175	69	22.5	2	12	2	1	9	2	37	16	15	6	69	18	17	17	17	41	11	15	15
280	16	1	186	68	19.7	2	12	2	7	6	3	32	13	16	3	86	21	24	23	18	29	9	11	9
267	16	1	172	55	18.6	3	2	2	3	10	2	31	14	12	5	60	18	11	17	14	17	6	8	3
130	13	1	170.3	57	19.7	3	4	1	3	2	4	24	10	12	2	72	18	18	18	18	14	8	4	2
275	16	2	163	53	19.9	4	15	1	2	6	0.5	18	8	8	2	79	24	23	14	18	14	5	6	3
119	18	1	181	70	21.4	2	11	2	1	6	1	30	12	12	6	72	18	18	18	18	30	10	10	10
254	16	2	170	54	18.7	3	14	3	1	8	4	30	12	12	6	72	18	18	18	18	30	10	10	10
123	22	2	165	50	18.4	3	1	3	11	9	4	31	11	18	2	84	20	20	21	23	40	12	16	12
233	16	1	179	73	22.8	4	1	2	3	4	5	22	12	8	2	119	30	30	30	29	24	12	9	3
124	17	2	162	50	19.1	4	11	2	2	5	4	10	4	4	2	120	30	30	30	30	14	4	2	8
125	8	1	146	32	15	5	1	1	6	1	0.5	18	5	11	2	120	30	30	30	30	11	6	4	1
106	10	1	145	30	14.3	5	1	1	3	4	2	10	4	4	2	84	27	25	14	18	4	4	0	0
149	10	2	140	25	12.8	5	11	1	6	1	0.5	12	4	6	2	114	24	30	30	30	41	11	15	15
138	8	2	133	25	14.1	5	14	1	4	2	0.5	24	12	10	2	71	18	17	18	18	30	10	11	9
103	8	2	138	84	44.1	5	2	1	6	2	7	10	4	4	2	72	13	20	21	18	15	9	2	4
132	8	1	130	25.2	14.9	5	2	1	6	1	0.5	11	5	4	2	72	17	18	20	17	31	11	10	10
116	8	2	128	26	15.9	5	11	1	2	1	0.5	14	4	8	2	79	30	20	19	10	4	2	1	1
122	9	2	140	25	12.8	5	1	1	6	1	0.5	14	5	7	2	92	23	29	20	20	15	7	4	4
125	9	1	148	32	14.6	5	1	1	0	1	0	12	6	4	2	77	26	20	14	17	19	7	5	7
108	9	2	138	27	14.2	5	11	1	3	0	0.5	10	4	4	2	63	17	15	13	18	8	6	0	2
125	8	1	153	59	25.2	5	1	1	4	3	0.5	30	12	12	6	74	18	19	19	18	33	10	10	13
139	7	1	123	22	14.5	5	1	1	3	5	1	18	5	11	2	91	24	24	23	20	31	13	10	8
123	9	2	150	32	14.2	5	1	1	12	1	0.5	10	4	4	2	117	30	30	28	29	13	7	0	6
158	8	2	135	34	18.7	5	1	1	2	2	0.5	21	8	9	4	97	25	24	24	24	41	11	15	15
127	6	2	120	22	15.3	5	10	1	6	6	0.5	21	11	8	2	80	20	20	21	19	6	1	3	2
117	8	1	137	29	15.5	5	14	1	0	2	0.5	16	6	8	2	65	23	19	12	11	7	5	2	0
112	7	2	130	24	14.2	5	2	1	0	1	0.5	12	4	6	2	97	27	23	24	23	14	7	3	4
110	10	2	140	30	15.3	5	1	1	0	2	0	10	4	4	2	84	26	27	14	17	2	2	0	0
132	8	2	140	71	36.2	5	2	1	5	2	0	16	7	7	2	91	22	24	24	21	22	9	6	7
134	8	1	145	30	14.3	5	8	1	7	1	1	26	8	14	4	95	24	24	24	23	10	3	1	6
114	8	1	135	34	18.7	5	7	1	7	2	0.5	10	4	4	2	95	29	25	22	19	4	0	0	4
111	8	2	135	24	13.2	5	7	1	0	1	0.5	12	6	4	2	87	19	28	21	19	7	7	0	0
113	8	1	146	41	19.2	5	13	1	1	2	3	20	8	8	4	76	18	19	21	18	14	7	4	3
136	7	2	132	32	18.4	5	10	1	3	2	0.5	10	4	4	2	97	25	24	24	24	29	7	12	10
240	6	2	110	30	24.8	5	12	1	12	2	0.5	22	10	10	2	92	23	23	22	24	21	7	6	8
122	7	1	134	28	15.6	5	1	1	3	0	0	16	7	7	2	94	22	28	23	21	16	9	3	4
145	9	2	140	24	12.2	5	13	1	1	2	1	21	7	12	2	94	23	24	24	23	28	8	10	10
125	7	2	127	25.6	15.9	5	1	1	0	3	1	16	4	10	2	88	25	24	18	21	13	6	3	4
124	8	2	130	25	14.8	5	11	1	3	3	1	21	9	10	2	78	22	22	18	16	15	10	2	3
128	8	2	140	60	30.6	1	2	1	4	1	0.5	15	8	5	2	79	22	20	14	23	13	3	4	6
128	8	2	130	25	14.8	5	2	1	5	3	2	24	10	12	2	82	17	26	23	16	17	8	4	5
136	8	2	125	20	12.8	5	10	1	11	3	0.5	22	4	16	2	101	28	30	23	20	18	4	7	7
101	8	1	135	23	12.6	5	1	1	2	0	0.5	11	4	5	2	67	21	17	14	15	20	9	6	5
122	9	1	141	72	36.2	5	1	1	9	1	0.5	17	5	10	2	90	25	23	22	20	7	3	1	3
116	7	1	135	30	16.5	5	11	1	4	0	1	15	8	5	2	93	23	29	21	20	7	5	1	1
106	9	2	138	26	13.7	5	1	1	0	3	0.5	10	4	4	2	92	30	30	26	6	4	4	0	0
125	8	1	145	34	16.2	5	1	1	2	3	1	19	9	8	2	87	21	22	23	21	10	5	3	2
126	9	1	140	30	15.3	5	8	1	3	4	0.5	10	4	4	2	96	24	24	24	24	20	7	6	7
118	10	1	152	37	16	5	2	1	5	2	2	14	7	5	2	86	26	27	16	17	8	2	5	1
124	10	1	138	26	13.7	5	11	1	0	6	0.5	16	10	4	2	67	12	17	25	13	18	11	4	3
114	7	2	126	26	16.4	5	7	1	6	1	1	10	4	4	2	114	30	30	30	24	4	0	0	4
131	7	2	125	22	14.1	5	11	1	11	5	2	24	6	10	8	54	14	14	13	13	19	9	5	5
140	9	2	136	25	13.5	5	4	1	4	3	0.5	22	9	10	3	83	17	23	20	23	26	11	9	6
127	7	2	127	24	14.9	5	10	1	6	5	0	15	6	7	2	32	8	7	7	10	14	5	3	6
123	8	1	137	30	16	5	1	1	6	4	1	14	5	7	2	74	20	18	18	18	19	7	6	6
256	16	2	166	55	20	3	2	2	4	7	5	34	15	16	3	72	18	18	18	18	35	10	15	10
113	8	2	150	40	17.8	5	13	1	1	0	1	10	4	4	2	100	27	26	23	24	5	1	0	4
152	8	1	140	41	20.9	5	1	1	4	2	2	30	12	12	6	72	18	18	18	18	30	10	10	10
117	10	1	140	68	34.7	5	14	2	5	3	0	10	4	4	2	120	30	30	30	30	7	2	1	4
131	7	2	126	22	13.9	5	11	1	0	3	0.5	18	8	8	2	51	14	12	11	14	19	6	7	6
102	9	2	141	30	15.1	5	10	1	3	1	0.5	10	4	4	2	24	6	6	6	6	8	8	0	0
103	10	2	149	35	15.8	5	2	1	3	2	0	10	4	4	2	40	15	8	10	7	9	8	0	1
111	7	2	129	27	16.2	5	7	1	9	1	0	11	5	4	2	79	21	26	18	14	0	0	0	0
119	8	1	136	27	14.6	5	11	1	3	3	0.5	10	4	4	2	96	24	24	24	24	17	9	2	6
147	7	2	125	22	14.1	5	2	1	3	4	0.5	26	7	13	6	76	18	19	19	20	38	12	12	14
130	8	1	134	35	19.5	5	4	1	6	3	1	16	7	7	2	97	27	28	26	16	17	7	9	1
114	9	2	140	29.5	15.1	5	7	1	4	2	0	11	5	4	2	96	27	30	22	17	3	2	0	1
125	8	2	130	22	13	5	1	1	3	1	0	14	4	8	2	72	18	18	18	18	21	8	7	6
123	7	2	128	25	15.3	5	1	1	7	2	0.5	21	8	11	2	78	22	18	19	19	30	10	10	10
122	9	1	137	29	15.5	5	1	1	7	3	1	13	7	4	2	104	30	27	21	26	9	3	0	6
111	9	2	138	26	13.7	5	7	1	3	3	0.5	10	4	4	2	94	30	30	20	14	1	1	0	0
121	7	1	130	34	20.1	5	1	1	7	3	1	15	5	7	3	87	27	29	18	13	8	5	0	3
117	9	2	157	45	18.3	5	14	1	2	1	1	17	7	8	2	86	22	24	18	22	4	2	2	0
116	7	2	126	22.5	14.2	5	11	1	1	0	0.5	13	5	6	2	72	25	18	15	14	7	2	3	2
135	7	1	125	30	19.2	5	2	1	6	2	1	21	10	9	2	87	19	24	24	20	20	10	6	4
158	7	2	138	25	13.1	5	1	1	3	9	0.5	28	11	12	5	106	25	26	27	28	32	6	12	14
102	7	1	130	52	30.8	5	10	1	1	2	1	10	4	4	2	24	6	6	6	6	8	8	0	0
119	8	2	132	26.9	15.4	5	11	1	2	1	0.5	13	7	4	2	76	20	23	12	21	10	6	1	3
114	9	2	138	30	15.8	5	7	1	5	2	0.5	13	5	6	2	78	23	29	14	12	8	6	2	0
119	11	1	149	43	19.4	5	11	1	5	5	0.5	23	11	7	5	96	23	25	25	23	10	8	0	2
132	8	1	130	31	18.3	5	2	1	2	2	0.5	10	4	4	2	92	21	24	23	24	30	10	10	10
92	9	2	128	28	17.1	5	1	1	3	2	0.5	12	6	4	2	52	14	16	14	8	8	8	0	0
112	10	2	140	27.5	14	5	2	1	7	4	0.5	14	7	5	2	83	22	23	20	18	4	3	1	0
161	13	2	163	43	16.2	5	11	1	8	8	4	40	16	16	8	96	24	24	24	24	42	11	16	15
118	7	1	132	27	15.5	5	2	1	5	1	0.5	13	7	4	2	88	26	30	14	18	5	1	0	4
121	7	1	132	32	18.4	5	1	1	6	2	1	16	6	8	2	112	28	29	27	28	9	7	2	0
102	10	2	142	30	14.9	5	10	2	4	3	0	18	6	10	2	70	23	25	13	9	8	5	3	0
84	11	2	154	33	13.9	5	7	2	3	1	0.5	10	4	4	2	56	18	10	18	10	8	8	0	0
162	10	2	130	25	14.8	5	1	1	3	4	0	10	4	4	2	40	18	6	10	6	52	12	20	20
135	10	2	150	36	16	5	2	1	1	6	1	22	10	10	2	87	22	24	22	19	19	8	6	5
134	7	1	128	30	18.3	5	8	1	4	3	0.5	18	8	7	3	96	24	24	24	24	24	9	8	7
116	15	1	182	65	19.6	4	11	2	5	5	1	23	9	12	2	83	20	25	18	20	21	10	6	5
125	9	2	138	24	12.6	5	1	1	1	1	0.5	11	4	5	2	112	30	30	28	24	14	2	6	6
125	9	1	143	32	15.6	5	1	1	3	7	0.5	21	9	10	2	70	23	18	16	13	11	7	4	0
109	7	1	140	60	30.6	5	1	1	1	3	0.5	11	4	5	2	83	21	24	14	24	6	4	0	2
122	11	1	156	35	14.4	5	1	1	3	3	0	17	7	8	2	56	14	15	13	14	9	5	2	2
192	12	1	163	80	30.1	5	3	2	9	8	2	20	4	12	4	41	12	6	12	11	8	8	0	0
123	10	1	135	30	16.5	5	1	2	0	1	0.5	12	6	4	2	90	26	27	15	22	21	8	4	9
110	13	2	162	51	19.4	4	1	2	8	5	0.5	14	5	7	2	89	26	24	20	19	18	13	2	3
126	14	2	165	50	18.4	4	8	2	2	4	0.5	14	4	8	2	108	30	25	28	25	16	5	6	5
138	12	1	169	57	20	5	14	1	4	6	0.5	15	8	5	2	69	14	21	17	17	31	11	10	10
115	8	2	140	40	20.4	5	1	1	7	0	1	10	4	4	2	102	24	27	25	26	7	5	1	1
114	13	2	166	50	18.1	5	7	2	3	5	0.5	13	5	6	2	85	25	25	18	17	8	5	3	0
123	9	1	151	36	15.8	5	1	2	8	1	0.5	10	4	4	2	113	30	30	27	26	13	3	3	7
118	7	2	129	24	14.4	5	2	1	1	1	1	10	4	4	2	64	17	17	16	14	10	5	3	2
110	12	2	150	37	16.4	5	1	2	4	6	0.5	17	9	6	2	72	24	24	14	10	10	6	3	1
126	13	1	165	52	19.1	5	8	2	3	0	6	18	4	12	2	114	30	30	30	24	16	8	5	3
83	10	2	146	36	16.9	5	13	1	5	2	0	20	9	9	2	72	18	18	18	18	19	9	5	5
124	11	2	142	30	14.9	5	11	1	5	3	0.5	14	4	8	2	91	29	28	16	18	14	7	7	0
144	11	2	160	41	16	5	9	2	15	7	0.5	22	16	4	2	82	23	21	13	25	32	15	9	8
102	8	2	140	32	16.3	5	10	1	3	2	0.5	10	4	4	2	24	6	6	6	6	8	8	0	0
127	9	1	146	35.5	16.7	5	10	1	7	3	0.5	10	4	4	2	112	25	30	29	28	19	7	6	6
118	9	1	156	40	16.4	4	2	1	3	0	0.5	13	6	5	2	81	23	20	22	16	7	4	1	2
118	10	1	148	36	16.4	5	2	1	6	2	0.5	14	6	6	2	110	27	28	29	26	6	2	3	1
123	11	1	155	92	38.3	5	1	2	6	4	0	18	9	7	2	73	18	23	19	13	9	5	3	1
235	16	2	168	53	18.8	2	8	2	6	6	3	21	7	12	2	98	23	29	17	29	11	6	3	2
226	11	1	160	47.5	18.6	4	2	2	4	4	1	14	4	8	2	97	30	27	21	19	1	0	1	0
143	12	2	160	46	18	4	11	2	15	1	1	22	7	13	2	93	27	23	24	19	33	10	10	13
129	10	2	134	27	15	5	10	2	9	3	0	18	5	11	2	76	22	22	12	20	15	5	7	3
143	11	2	160	40	15.6	4	11	2	5	0	1	21	8	11	2	78	24	19	19	16	32	12	11	9
211	11	1	165	40.5	14.9	5	11	2	7	0	0.5	14	5	7	2	89	24	30	23	12	4	3	1	0
126	8	2	123	22	14.5	5	8	1	9	3	0.5	15	5	8	2	80	25	21	12	22	15	8	4	3
112	8	1	135	22	12.1	5	2	1	1	1	1	12	4	6	2	93	30	27	20	16	0	0	0	0
154	12	2	157	38	15.4	5	14	2	5	6	1	28	12	14	2	86	22	23	20	21	41	13	14	14
113	11	2	155	73	30.4	4	13	2	5	1	1	10	4	4	2	116	30	30	29	27	3	1	1	1
117	11	2	160	45	17.6	4	14	2	1	2	2	11	4	5	2	117	28	30	30	29	8	5	2	1
162	19	1	176	65	21	3	1	3	3	7	3	10	4	4	2	120	30	30	30	30	52	12	20	20
115	19	2	160	57	22.3	3	1	3	1	3	4	20	8	8	4	80	18	21	22	19	25	9	7	9
113	19	2	166	62	22.5	3	13	2	2	4	7	11	5	4	2	92	22	24	23	23	19	7	7	5
135	20	1	193	88	23.6	2	2	3	4	3	6	23	7	12	4	95	24	24	24	23	31	9	12	10
138	19	1	186	77	22.3	5	14	1	6	7	7	20	9	8	3	90	21	28	21	20	22	6	8	8
147	22	1	176	78	25.2	2	2	3	3	8	3	18	10	6	2	102	20	30	22	30	29	6	10	13
240	16	1	185	75	21.9	3	12	2	6	2	1	15	5	8	2	100	30	30	23	17	10	4	4	2
107	19	2	168	57	20.2	3	7	3	3	11	7	10	4	4	2	110	29	30	25	26	3	0	3	0
232	16	2	175	63	20.6	2	11	2	7	7	1	23	9	12	2	75	24	20	18	13	24	10	8	6
241	16	1	185	83	24.3	3	6	2	6	6	1	13	5	6	2	97	30	28	17	22	13	5	5	3
111	22	1	189	85	23.8	4	7	2	2	3	2	10	4	4	2	96	24	24	24	24	5	3	1	1
123	19	2	180	75	23.1	3	1	3	4	4	4	21	9	8	4	90	22	23	24	21	16	6	4	6
135	19	1	188	78	22.1	3	2	3	1	4	2	20	8	8	4	72	18	18	18	18	32	9	12	11
114	22	2	171	57	19.5	3	7	3	0	1	3	10	4	4	2	120	30	30	30	30	6	4	0	2
144	18	1	172	75	25.4	3	9	3	18	0	1	14	8	4	2	96	30	28	20	18	34	12	8	14
273	17	1	178	72	22.7	3	16	2	3	2	1	17	5	10	2	108	30	30	23	25	8	3	4	1
261	17	2	160	58	22.7	4	14	2	14	10	6	21	6	13	2	118	30	30	28	30	27	9	12	6
293	17	1	179	78	24.3	4	14	3	8	11	4	22	8	12	2	85	23	24	17	21	27	12	7	8
302	17	1	175	68	22.2	4	14	3	1	5	3	35	15	17	3	88	24	21	27	16	51	16	17	18
123	19	1	182	86	26	3	1	2	5	7	6	20	8	8	4	96	24	24	24	24	17	6	2	9
130	23	1	185	65	19	3	4	3	6	10	7	13	4	7	2	120	30	30	30	30	21	3	8	10
117	15	1	180	60	18.5	4	14	2	4	3	2	11	4	5	2	79	30	21	15	13	6	6	0	0
101	21	1	175	65	21.2	5	1	2	3	6	3	20	8	8	4	89	24	22	22	21	14	5	2	7
121	20	2	169	49	17.2	5	1	1	3	4	7	21	8	11	2	94	24	24	24	22	15	9	2	4
114	12	1	167	45	16.1	4	7	2	2	1	2	13	4	7	2	88	24	28	20	16	3	2	1	0
124	20	1	178	80	25.2	4	11	3	12	4	4	16	4	10	2	112	30	28	28	26	38	10	14	14
227	17	2	167	67	24	3	8	3	6	8	2	31	13	15	3	80	18	23	21	18	36	13	14	9
255	17	1	192	88	23.9	3	11	2	5	6	2	21	7	12	2	86	21	24	21	20	18	6	7	5
132	14	2	165	55	20.2	4	2	1	2	9	2	22	9	11	2	74	18	18	20	18	29	9	12	8
240	17	1	175	70	22.9	3	12	3	5	3	3	20	8	10	2	106	23	30	27	26	14	5	6	3
300	17	1	181	70	21.4	3	11	3	3	4	6	10	4	4	2	120	30	30	30	30	48	12	20	16
140	18	1	181	70	21.4	5	4	1	0	4	5	12	4	6	2	120	30	30	30	30	32	10	12	10
234	17	2	165	63	23.1	3	11	3	10	4	4	32	12	18	2	90	22	29	25	14	35	14	16	5
149	19	2	167	69	24.7	3	11	2	16	8	7	26	10	14	2	99	14	29	28	28	27	10	11	6
174	17	1	189	83	23.2	3	2	2	5	5	3	18	8	8	2	80	23	19	19	19	21	10	5	6
148	10	2	154	40	16.9	4	16	2	4	2	2	26	7	13	6	87	27	21	22	17	26	8	10	8
113	23	1	174	70	23.1	4	13	2	2	4	5	20	8	8	4	96	24	24	24	24	23	9	7	7
127	11	1	160	42	16.4	5	10	2	3	3	1	16	7	7	2	102	25	28	26	23	11	1	4	6
123	13	1	161	45	17.4	4	1	2	5	2	3	15	5	8	2	88	24	24	21	19	14	8	2	4
139	15	1	183	65	19.4	4	1	2	3	6	0.5	28	12	12	4	74	20	18	18	18	30	10	10	10
237	17	1	182	74	22.3	3	5	2	5	2	5	10	4	4	2	120	30	30	30	30	15	4	6	5
125	22	2	175	70	22.9	4	1	2	3	3	3	10	4	4	2	120	30	30	30	30	18	5	6	7
263	17	1	184	79	23.3	3	2	2	15	5	1	30	9	16	5	82	24	22	21	15	29	11	11	7
292	17	2	170	60	20.8	3	12	2	18	14	5	34	12	20	2	61	12	20	9	20	27	10	14	3
221	17	2	174	66	21.8	2	14	3	6	14	6	13	4	7	2	98	28	30	21	19	10	7	2	1
124	19	2	172	64	21.6	4	11	2	1	3	2	13	6	5	2	118	30	30	29	29	17	7	4	6
107	19	2	174	80	26.4	3	7	3	1	7	2	10	4	4	2	74	22	17	20	15	10	2	5	3
137	21	2	173	63	21	4	2	3	4	5	2	25	10	12	3	79	18	20	22	19	25	10	7	8
169	17	1	181	64	19.5	2	1	3	1	8	5	17	7	8	2	55	15	15	13	12	22	8	9	5
202	17	1	184	68	20.1	3	15	2	5	3	3	18	4	12	2	93	30	24	22	17	9	4	3	2
165	17	1	178	77	24.3	3	1	3	2	5	2	10	4	4	2	56	6	19	12	19	22	8	7	7
252	17	2	170	68	23.5	3	3	3	1	7	4	26	12	12	2	72	18	18	18	18	30	10	10	10
293	17	1	180	75	23.1	3	14	3	5	12	3	20	8	8	4	72	18	18	18	18	41	11	15	15
115	10	2	140	30	15.3	5	1	1	6	1	0.5	10	4	4	2	119	29	30	30	30	9	5	1	3
257	17	1	181	75	22.9	3	2	3	3	4	2	28	9	15	4	94	24	24	24	22	23	6	8	9
126	14	1	177	57	18.2	4	8	3	5	3	1	18	6	10	2	95	23	29	19	24	22	9	7	6
215	17	2	168	52	18.4	3	11	2	1	9	5	25	11	12	2	58	11	12	15	20	35	13	13	9
251	17	1	189	83	23.2	2	1	2	10	7	5	20	9	9	2	106	26	30	24	26	18	8	6	4
138	13	2	171	50	17.1	4	14	2	0	8	2	16	5	9	2	82	16	22	25	19	32	10	16	6
117	14	1	173	63	21	3	14	2	1	2	6	14	4	8	2	85	24	23	21	17	20	8	7	5
257	17	2	182	66	19.9	2	2	3	3	3	3	22	8	12	2	73	20	20	15	18	17	5	9	3
122	11	2	161	42	16.2	4	1	2	3	3	2	14	4	8	2	120	30	30	30	30	12	6	5	1
153	22	2	170	70	24.2	3	5	2	8	4	4	20	8	8	4	86	21	26	21	18	37	8	15	14
149	13	1	176	51	16.5	4	11	2	1	1	0.5	19	9	8	2	87	20	23	21	23	36	10	15	11
130	13	1	168	57	20.2	4	4	2	8	2	2	23	9	11	3	92	24	24	22	22	21	5	8	8
145	14	2	163	54	20.3	3	13	2	3	7	5	24	10	12	2	72	19	18	18	17	34	12	10	12
133	13	1	174	60	19.8	4	7	2	3	4	2	14	4	8	2	81	24	18	20	19	23	7	10	6
266	18	1	176	68	22	3	10	3	5	4	3	30	12	12	6	72	18	18	18	18	30	10	10	10
140	13	1	165	50	18.4	4	4	2	9	2	2	22	7	13	2	83	22	24	21	16	37	13	18	6
141	13	2	168	52	18.4	4	1	2	7	2	1	24	9	13	2	77	26	22	18	11	27	10	11	6
129	11	1	166	48	17.4	4	10	2	4	2	1	21	7	11	3	72	17	24	16	15	18	4	8	6
209	18	1	185	82	24	2	8	3	3	7	4	29	11	13	5	75	21	18	20	16	38	11	12	15
197	18	2	170	64	22.1	2	12	3	15	5	7	34	14	15	5	91	20	24	24	23	33	13	11	9
138	19	1	182	73	22	4	14	1	3	3	4	15	5	8	2	120	30	30	30	30	25	5	10	10
111	10	2	141	29	14.6	5	7	1	6	1	0.5	12	6	4	2	94	30	30	15	19	5	5	0	0
180	18	1	183	82	24.5	2	11	3	6	8	6	19	6	11	2	76	16	27	20	13	34	14	12	8
110	14	2	171	52	17.8	3	1	2	1	2	2	10	4	4	2	99	27	30	23	19	0	0	0	0
148	14	1	173	60	20	3	16	2	3	1	2	25	12	9	4	72	18	18	18	18	31	11	10	10
126	10	2	157	38	15.4	4	8	1	3	1	1	18	7	8	3	82	23	23	16	20	10	5	0	5
135	13	1	170	59	20.4	4	2	2	3	5	1	18	6	10	2	76	19	20	19	18	21	10	7	4
212	18	2	175	70	22.9	3	12	2	12	6	7	28	12	13	3	70	18	17	16	19	41	17	13	11
243	18	1	186	77	22.3	3	2	3	9	4	2	22	6	14	2	96	24	25	20	27	31	10	10	11
270	18	1	195	81	21.3	2	2	2	6	11	5	40	16	16	8	90	24	23	22	21	29	11	10	8
138	20	2	169	56	19.6	4	14	2	4	4	5	27	11	14	2	86	22	22	22	20	28	7	11	10
125	14	1	178	55	17.4	4	1	2	4	1	2	17	6	9	2	100	24	27	24	25	21	5	9	7
241	18	1	178	75	23.7	3	6	3	11	4	4	16	6	5	5	90	22	23	24	21	24	9	10	5
91	14	2	166	53	19.2	4	2	2	11	1	3	10	4	4	2	120	30	30	30	30	8	8	0	0
252	18	1	181	70.8	21.6	2	3	2	5	6	3	10	4	4	2	24	6	6	6	6	8	8	0	0
139	13	1	166	57	20.7	4	1	2	1	5	0.5	17	7	8	2	72	18	18	18	18	30	10	10	10
119	15	1	181	68	20.8	3	11	2	10	4	0.5	12	4	6	2	91	30	23	19	19	11	5	4	2
214	12	2	153	35	15	4	9	1	9	0	0.5	21	7	12	2	120	30	30	30	30	20	8	6	6
135	26	2	180	85	26.2	4	2	1	8	7	4	31	13	14	4	74	18	17	19	20	32	10	11	11
112	14	1	180	60	18.5	4	2	2	5	4	2	12	5	5	2	90	20	23	23	24	12	5	6	1
172	18	2	176	61	19.7	2	14	2	3	3	4	16	6	8	2	92	26	26	22	18	15	6	5	4
129	12	1	156	80	32.9	5	10	2	0	2	3	23	10	10	3	80	15	22	21	22	16	9	3	4
116	10	1	150	45	20	5	11	1	2	4	0.5	11	4	5	2	92	24	22	23	23	13	8	2	3
105	8	2	140	30	15.3	5	10	1	0	2	0.5	10	4	4	2	115	30	28	29	28	5	5	0	0
124	11	2	144	40	19.3	5	11	1	1	1	0.5	13	6	5	2	71	18	18	18	17	19	11	2	6
124	8	2	137	39	20.8	5	11	1	15	4	0.5	20	8	10	2	64	16	19	15	14	10	6	2	2
133	18	2	160	57	22.3	4	7	2	1	3	3	21	10	9	2	87	23	23	21	20	16	4	5	7
223	18	1	175	63	20.6	5	11	1	4	6	4	22	6	12	4	92	24	23	24	21	25	12	8	5
102	11	2	153	40	17.1	5	10	2	3	1	0.5	10	4	4	2	24	6	6	6	6	8	8	0	0
112	11	1	149	36	16.2	5	2	2	1	3	1	11	5	4	2	100	27	25	24	24	5	2	2	1
128	11	2	160	45	17.6	4	2	2	2	2	0.5	17	6	9	2	96	24	24	24	24	17	7	4	6
131	14	1	183	68	20.3	4	11	2	2	1	4	10	4	4	2	116	30	30	30	26	25	6	9	10
238	10	2	155	43	17.9	5	8	1	2	0	1	17	6	9	2	65	20	16	14	15	15	7	4	4
112	7	2	135.2	31	17	5	2	1	6	0	0.5	10	4	4	2	105	30	30	26	19	2	1	0	1
125	9	1	142	30	14.9	5	1	1	0	0	1	15	6	7	2	81	21	21	14	25	10	2	4	4
102	11	2	155	75	31.2	4	10	2	4	3	0.5	10	4	4	2	120	30	30	30	30	8	8	0	0
108	7	1	142	45	22.3	5	11	1	7	1	0	14	6	6	2	79	21	25	17	16	2	2	0	0
117	14	1	175	63	20.6	3	14	2	2	8	1	22	10	10	2	86	23	24	21	18	22	6	8	8
107	6	1	123	24	15.9	5	7	1	6	1	1	11	4	5	2	120	30	30	30	30	4	4	0	0
135	8	2	135	28.5	15.6	5	2	1	4	0	1	18	9	7	2	77	20	23	16	18	23	10	8	5
197	18	1	174	63	20.8	2	12	2	3	0	0	10	4	4	2	116	26	30	30	30	6	4	2	0
121	19	1	185	80	23.4	2	1	3	0	12	7	20	8	8	4	72	18	18	18	18	21	7	8	6
136	18	1	186	74	21.4	2	10	2	0	4	3	21	8	10	3	88	21	23	24	20	19	9	9	1
69	15	1	175	75	24.5	4	8	3	3	0	7	10	4	4	2	24	6	6	6	6	8	8	0	0
259	18	2	171	60	20.5	2	6	2	8	7	4	29	12	15	2	72	23	17	18	14	26	9	13	4
250	18	2	177	61	19.5	2	12	2	7	6	4	26	9	15	2	92	23	22	26	21	26	8	11	7
114	23	1	181	75	22.9	3	7	3	7	4	7	22	12	8	2	72	12	18	18	24	21	8	7	6
211	18	1	181	75	22.9	3	11	2	5	1	1	30	12	12	6	72	18	18	18	18	30	10	10	10
115	10	1	151	36	15.8	4	1	1	3	3	1	13	4	7	2	96	24	24	24	24	9	4	2	3
126	16	1	183	70	20.9	3	8	2	4	6	3	28	13	12	3	74	18	18	21	17	32	12	13	7
112	10	2	160	40	15.6	4	2	1	4	2	1	16	8	6	2	91	24	23	22	22	11	5	5	1
114	10	1	143	35	17.1	4	7	1	1	4	0.5	11	4	5	2	86	21	24	19	22	7	3	3	1
118	11	2	143	31	15.2	4	2	2	3	1	0.5	12	6	4	2	53	27	6	10	10	16	11	3	2
119	15	1	187	80	22.9	3	11	2	5	2	3	13	4	7	2	87	28	27	19	13	8	5	3	0
294	18	1	177	62	19.8	3	2	2	3	10	7	31	9	17	5	72	18	18	18	18	26	10	11	5
122	10	2	148	34.5	15.8	5	1	2	3	2	1	18	6	10	2	99	30	29	24	16	4	2	2	0
148	10	1	143	34	16.6	5	16	1	3	4	1	28	8	17	3	101	27	26	24	24	25	13	9	3
118	14	1	184.5	61	17.9	4	2	2	3	2	5	10	4	4	2	113	29	30	25	29	10	3	3	4
186	18	2	168	70	24.8	4	2	2	9	9	3	24	10	10	4	74	18	18	20	18	59	19	20	20
106	9	1	140	29	14.8	5	1	1	4	3	0.5	10	4	4	2	120	30	30	30	30	4	4	0	0
257	18	2	164	55	20.4	3	2	3	14	17	7	33	11	16	6	85	22	21	20	22	34	11	12	11
245	18	2	165	56	20.6	3	3	2	8	9	4	25	9	13	3	74	20	18	18	18	30	10	10	10
117	13	1	164	45	16.7	4	14	1	2	2	6	13	4	7	2	58	19	17	10	12	10	7	3	0
121	13	2	158	47	18.8	4	1	1	2	4	0.5	14	7	5	2	67	15	21	15	16	18	10	5	3
133	15	2	176	63	20.3	2	7	2	7	5	4	21	10	9	2	74	19	21	20	14	20	12	6	2
237	12	1	144	43	20.7	4	5	2	13	3	0	22	5	15	2	72	20	24	16	12	19	8	8	3
233	18	1	180	62	19.1	2	1	2	9	4	3	20	8	8	4	88	18	24	22	24	22	9	8	5
129	14	1	172	57	19.3	4	10	1	6	4	1	22	5	15	2	104	30	26	26	22	17	8	6	3
248	18	1	181	78	23.8	3	8	3	5	5	4	20	8	8	4	94	24	24	24	22	32	11	11	10
126	22	2	165	67	24.6	4	8	2	5	7	6	23	11	10	2	82	22	21	20	19	44	10	18	16
259	18	2	172	62	21	2	6	2	3	3	3	29	11	12	6	72	18	18	18	18	32	9	12	11
102	7	1	139	55.6	28.8	5	10	1	3	1	0	10	4	4	2	24	6	6	6	6	8	8	0	0
291	18	1	187	73	20.9	3	9	2	3	4	7	10	4	4	2	116	30	30	30	26	52	12	20	20
243	12	1	144	43	20.7	4	2	2	15	3	0	21	4	13	4	84	24	18	21	21	22	9	8	5
220	18	1	173	63	21	3	2	3	3	7	7	25	11	11	3	87	23	22	25	17	29	4	11	14
136	12	2	158	44	17.6	4	10	2	3	5	0.5	12	4	6	2	87	22	22	23	20	30	9	10	11
257	19	1	175	71	23.2	2	2	2	6	8	5	36	13	18	5	99	25	26	27	21	21	9	9	3
234	12	1	144	43	20.7	4	11	2	15	3	0	16	6	7	3	74	17	19	20	18	28	9	11	8
121	13	2	176	62	20	3	1	1	5	5	5	17	7	8	2	67	14	22	18	13	8	1	5	2
136	17	2	170	55	19	4	10	3	8	1	3	14	8	4	2	90	22	24	21	23	26	6	10	10
227	19	1	186	82	23.7	2	8	3	9	6	7	18	6	10	2	117	30	28	29	30	26	9	11	6
277	19	1	182	83	25.1	3	2	3	13	6	2	26	8	14	4	88	23	24	20	21	32	11	11	10
234	19	1	176	72	23.2	3	11	3	12	1	7	10	4	4	2	97	30	28	22	17	9	2	6	1
130	17	2	162	52	19.8	2	4	2	10	10	3	18	8	8	2	93	24	24	23	22	16	5	7	4
110	15	1	173	69	23.1	3	1	3	1	6	2	18	8	8	2	84	21	22	21	20	29	8	12	9
210	19	1	180	77	23.8	2	4	3	6	2	4	30	12	12	6	72	18	18	18	18	52	12	20	20
144	14	2	166	52	18.9	3	9	3	8	4	3	17	7	8	2	100	28	26	24	22	29	8	11	10
128	14	2	164	52	19.3	3	2	2	8	4	3	22	7	13	2	96	23	25	27	21	11	5	4	2
114	15	2	170	60	20.8	2	7	2	6	3	6	25	10	12	3	53	16	12	12	13	30	10	10	10
206	19	1	186	89	25.7	2	15	3	1	4	7	26	9	13	4	88	22	22	24	20	23	6	10	7
125	17	2	172	59	19.9	3	1	2	6	2	0	24	11	11	2	93	22	24	24	23	33	11	11	11
134	19	1	187	80	22.9	2	8	2	3	13	2	20	8	10	2	74	20	21	20	13	24	11	7	6
223	19	2	178	65	20.5	3	11	3	2	4	5	29	12	13	4	85	20	21	21	23	39	12	14	13
162	14	1	178	68	21.5	4	1	2	3	1	2	10	4	4	2	120	30	30	30	30	52	12	20	20
137	17	2	178	62	19.6	2	2	2	12	11	0	29	16	11	2	74	22	15	21	16	36	12	14	10
113	15	2	165	60	22	2	13	2	7	6	0	25	12	11	2	59	12	16	16	15	31	10	10	11
235	19	1	180	75	23.1	3	8	3	6	4	3	10	4	4	2	112	30	30	26	26	8	5	3	0
148	14	2	165	50	18.4	3	16	2	5	3	3	20	7	11	2	77	22	25	18	12	33	9	12	12
127	13	2	161	50	19.3	4	10	2	5	3	1	18	6	10	2	120	30	30	30	30	13	1	7	5
227	19	1	179	71	22.2	3	8	3	7	7	4	22	8	11	3	96	24	24	24	24	18	6	5	7
121	12	2	164	54	20.1	3	1	2	6	1	2	17	7	8	2	86	23	24	17	22	8	3	4	1
125	12	2	176	53	17.1	3	1	1	6	1	1	14	5	7	2	89	22	25	20	22	17	7	9	1
123	10	2	162	44	16.8	4	1	1	3	2	1	16	5	9	2	91	24	24	21	22	14	7	7	0
103	11	1	154	40	16.9	5	2	2	6	1	0	13	4	7	2	96	24	24	24	24	3	2	0	1
155	14	1	168	51	18.1	4	11	2	5	3	2	35	20	13	2	65	19	18	16	12	24	8	12	4
213	19	2	171	67	22.9	4	10	3	4	6	5	24	11	11	2	72	18	18	18	18	30	10	10	10
124	13	1	182	70	21.1	3	11	2	6	4	3	15	4	9	2	120	30	30	30	30	11	5	6	0
294	19	2	173	61	20.4	4	2	2	1	6	3	10	4	4	2	75	10	25	20	20	40	10	16	14
121	15	1	185	70	20.5	3	1	2	1	10	3	30	12	12	6	61	16	17	13	15	30	9	11	10
307	19	1	183	83	24.8	3	11	3	2	5	3	10	4	4	2	120	30	30	30	30	52	12	20	20
202	19	2	168	57	20.2	4	15	3	4	7	5	20	9	9	2	52	12	15	12	13	19	9	5	5
128	12	2	176	53	17.1	3	2	1	6	1	1	21	10	9	2	83	24	19	18	22	17	9	6	2
133	13	1	163	55	20.7	4	7	2	7	4	3	21	8	11	2	74	19	19	19	17	20	7	7	6
112	15	2	171	61	20.9	4	2	2	5	4	1	10	4	4	2	68	28	18	15	7	6	5	1	0
248	19	1	190	85	23.5	2	8	3	6	2	4	19	6	11	2	87	26	22	21	18	20	4	10	6
112	10	1	150	40	17.8	4	2	2	2	2	0.5	11	4	5	2	111	30	29	27	25	3	2	1	0
254	19	1	188	70	19.8	2	14	3	2	4	4	27	12	12	3	72	18	18	18	18	30	10	10	10
115	13	2	163	46	17.3	3	1	1	4	0	3	17	5	10	2	63	20	18	11	14	5	4	0	1
267	19	1	177	63.8	20.4	3	2	3	3	5	5	19	8	8	3	106	24	28	26	28	26	5	10	11
137	13	2	170	56	19.4	3	2	2	16	5	1	28	7	18	3	90	22	24	23	21	19	8	8	3
129	13	2	167	49	17.6	2	10	2	6	1	2	16	6	8	2	106	28	28	28	22	15	5	8	2
220	19	2	172	59	19.9	3	2	3	3	4	4	20	8	8	4	64	15	17	14	18	30	10	10	10
202	19	1	185	90	26.3	3	15	3	12	4	3	24	11	11	2	92	24	24	23	21	29	8	9	12
120	24	1	176	80	25.8	4	2	2	2	4	2	13	5	6	2	86	22	26	17	21	11	4	5	2
111	10	2	150	78	34.7	4	7	2	8	0	0	10	4	4	2	119	29	30	30	30	1	1	0	0
230	19	2	178	65	20.5	3	2	3	4	6	5	25	10	11	4	106	19	29	28	30	32	10	11	11
243	19	1	188	85	24	1	2	3	4	4	5	22	7	12	3	78	19	24	21	14	7	1	5	1
133	23	1	172	84.5	28.6	3	7	2	4	11	5	22	10	9	3	89	24	24	19	22	21	8	7	6
165	19	2	171	59	20.2	3	1	2	3	7	4	13	6	5	2	87	22	24	22	19	38	11	12	15
130	11	2	154	36	15.2	4	4	1	6	1	0.5	19	9	8	2	78	19	19	20	20	18	6	7	5
204	19	1	176	70	22.6	4	14	3	1	6	4	20	8	8	4	48	12	12	12	12	19	9	5	5
120	14	1	181	57	17.4	4	2	2	6	2	0	12	4	6	2	83	20	25	22	16	15	7	7	1
279	11	2	160	41	16	5	1	1	13	2	0.5	25	6	16	3	79	28	25	13	13	14	6	6	2
138	13	2	165	49	18	4	14	1	8	4	1	21	9	10	2	71	19	19	18	15	25	8	10	7
265	19	2	171	65	22.2	3	2	3	8	11	7	27	12	11	4	90	15	22	29	24	51	13	19	19
105	10	1	140	32.7	16.7	5	10	1	3	6	2	28	10	14	4	86	21	23	21	21	35	11	13	11
317	19	1	180	85	26.2	3	3	2	3	7	6	30	20	8	2	116	26	30	30	30	52	12	20	20
122	20	2	170	52	18	4	1	2	2	5	4	15	7	5	3	72	18	18	18	18	19	9	5	5
130	11	2	148	76	34.7	5	4	1	3	2	2	16	7	6	3	89	21	26	19	23	22	7	6	9
245	19	1	183	77	23	2	3	2	6	3	7	35	16	17	2	91	20	19	30	22	43	10	18	15
192	19	1	182	74	22.3	2	3	2	2	1	2	10	4	4	2	24	6	6	6	6	8	8	0	0
118	11	1	155	40	16.6	4	2	2	3	2	1	13	4	7	2	82	25	30	17	10	8	3	5	0
120	19	2	171	60	20.5	3	2	1	1	4	4	20	8	8	4	72	18	18	18	18	30	10	10	10
115	19	1	170	58	20.1	3	1	2	0	9	7	20	10	6	4	109	24	29	27	29	19	12	4	3
162	21	1	180	75	23.1	4	1	1	5	4	0	30	11	14	5	86	24	20	22	20	40	12	14	14
149	20	1	182	60	18.1	4	11	3	5	13	3	38	16	20	2	68	6	6	30	26	60	20	20	20
122	12	1	169	52.5	18.4	4	1	1	7	0	1	12	4	6	2	106	30	30	23	23	14	6	4	4
133	22	2	163.5	51.5	19.3	4	7	2	1	5	5	25	13	10	2	91	19	24	24	24	30	13	9	8
112	26	1	195	78	20.5	3	2	3	4	5	3	10	4	4	2	110	30	30	26	24	8	3	4	1
244	19	1	184	68	20.1	3	5	2	3	7	4	10	4	4	2	88	30	22	22	14	8	6	0	2
323	19	1	181	72	22	3	11	3	6	7	7	30	12	16	2	113	24	30	30	29	52	16	20	16
139	24	2	168	53	18.8	3	1	3	0	13	0	24	12	8	4	80	18	20	22	20	30	6	12	12
254	19	2	167	65	23.3	3	14	2	13	4	4	33	13	17	3	91	23	24	24	20	45	12	17	16
250	19	1	186	73	21.1	4	12	1	6	5	5	20	8	8	4	56	18	12	14	12	20	9	7	4
118	13	1	165	40	14.7	5	2	2	4	6	0	12	6	4	2	112	22	30	30	30	6	6	0	0
242	19	1	180	80	24.7	3	6	3	4	5	4	14	6	6	2	82	26	18	20	18	29	10	10	9
193	19	2	165	58	21.3	4	2	3	1	9	2	25	11	10	4	58	12	16	15	15	26	10	7	9
154	19	2	189	74	20.7	4	14	1	2	7	7	31	12	13	6	73	20	18	16	19	31	11	9	11
122	15	2	172	50	16.9	4	1	2	2	3	2	18	8	8	2	78	23	21	18	16	10	5	3	2
101	25	1	190	102.5	28.4	3	1	2	1	3	4	25	12	9	4	55	12	14	16	13	23	10	7	6
118	21	2	164	60	22.3	3	2	2	5	13	5	22	10	6	6	82	21	24	19	18	31	8	11	12
110	11	2	150	35.45	15.8	4	1	2	6	2	0.5	10	4	4	2	107	30	28	25	24	8	4	0	4
117	25	1	170	65	22.5	4	14	2	1	3	3	10	4	4	2	44	9	12	11	12	17	8	5	4
244	19	1	180	95	29.3	3	5	2	14	7	5	10	4	4	2	74	15	21	20	18	39	13	13	13
291	19	1	170	60	20.8	3	9	2	2	7	7	30	12	12	6	72	18	18	18	18	30	10	10	10
133	9	2	130	25	14.8	5	7	1	5	6	1	17	8	7	2	104	21	28	27	28	18	8	5	5
125	25	1	172	75	25.4	5	1	2	5	7	7	19	8	8	3	72	20	19	15	18	20	7	7	6
132	23	1	180	64	19.8	4	2	2	3	2	5	10	4	4	2	90	30	24	20	16	30	10	10	10
119	25	1	182	83	25.1	3	11	3	5	6	3	30	12	12	6	72	18	18	18	18	30	10	10	10
136	16	1	166	51	18.5	4	10	2	2	8	5	10	4	4	2	84	20	20	20	24	34	10	13	11
122	10	2	153	35	15	4	1	2	0	1	1	10	4	4	2	120	30	30	30	30	12	2	2	8
123	11	2	160	52	20.3	5	1	2	12	4	2	12	4	6	2	87	18	18	28	23	23	15	4	4
222	19	1	180	75	23.1	4	17	1	8	3	4	10	4	4	2	96	24	24	24	24	35	8	15	12
131	10	2	141	28	14.1	5	11	2	6	3	1	22	8	12	2	70	15	21	17	17	17	11	2	4
127	13	1	160	40	15.6	4	10	2	6	4	0	18	4	12	2	89	24	24	20	21	13	8	5	0
244	19	2	175	65	21.2	2	5	2	12	3	2	27	9	16	2	95	22	24	24	25	30	14	9	7
133	15	1	174	65	21.5	5	7	1	2	2	1	17	5	10	2	112	30	30	26	26	24	10	8	6
113	12	1	159	42	16.6	4	13	2	9	4	6	13	5	6	2	68	25	21	12	10	8	4	4	0
138	13	1	160	50	19.5	4	14	2	0	4	0.5	22	11	9	2	48	12	12	12	12	22	8	7	7
113	12	1	159	42	16.6	4	13	2	9	4	6	13	5	6	2	68	25	21	12	10	8	4	4	0
199	20	1	183	80	23.9	3	16	3	2	4	4	10	4	4	2	112	30	30	24	28	30	10	10	10
114	11	2	151	32	14	5	7	1	2	4	0.5	10	4	4	2	86	23	21	20	22	8	4	2	2
133	13	2	156	40	16.4	4	7	2	1	2	1	17	7	8	2	95	24	24	23	24	20	7	5	8
124	13	1	170	60	20.8	5	11	1	0	5	1	12	4	6	2	93	24	24	23	22	22	10	5	7
236	11	1	157	49	19.9	4	11	2	9	3	2	18	5	11	2	106	30	30	22	24	5	1	4	0
259	12	1	160	50	19.5	5	6	1	5	8	2	23	8	12	3	84	18	23	20	23	27	12	9	6
114	10	1	140	30	15.3	5	7	1	0	5	0.5	10	4	4	2	82	25	26	17	14	4	3	0	1
137	13	1	158	51	20.4	4	2	2	10	4	2	21	10	9	2	75	19	20	18	18	20	7	6	7
128	24	2	168	62	22	3	2	3	7	2	3	24	6	14	4	103	25	25	26	27	16	5	4	7
123	9	2	135	31	17	5	1	1	6	1	0.5	10	4	4	2	107	30	26	26	25	15	7	4	4
134	19	2	166	55	20	4	8	3	2	8	5	19	7	8	4	86	20	23	22	21	34	9	13	12
219	20	2	178	68	21.5	2	9	3	7	8	7	26	11	12	3	67	12	19	14	22	32	13	11	8
126	23	1	193	95	25.5	3	8	3	4	4	2	11	4	5	2	81	21	23	14	23	19	6	7	6
214	20	1	189	82	23	2	9	2	3	2	7	23	10	10	3	81	22	23	19	17	25	12	6	7
147	10	1	150	35	15.6	5	2	2	3	1	0.5	10	4	4	2	120	30	30	30	30	41	11	15	15
140	15	1	170	60	20.8	4	4	2	3	4	0.5	22	8	11	3	81	21	20	20	20	31	10	10	11
205	10	2	153	44	18.8	5	2	1	2	3	0.5	10	4	4	2	120	30	30	30	30	1	1	0	0
134	14	2	156	40	16.4	4	8	1	1	3	0.5	17	8	7	2	72	18	18	18	18	21	7	7	7
268	20	1	186	83	24	3	1	2	3	2	3	10	4	4	2	120	30	30	30	30	16	4	8	4
178	20	1	186	80	23.1	2	11	3	6	17	7	50	20	20	10	120	30	30	30	30	32	12	7	13
128	22	2	171	57	19.5	3	2	3	0	5	3	13	4	7	2	97	25	26	23	23	22	6	5	11
246	20	2	168	56	19.8	4	13	2	3	6	5	18	7	9	2	107	25	28	28	26	22	6	6	10
148	19	2	170	57.5	19.9	3	16	2	9	7	5	24	11	11	2	104	30	26	27	21	32	10	14	8
133	11	1	166	53	19.2	4	7	2	10	4	2	22	8	12	2	100	25	28	25	22	15	2	6	7
210	20	1	175	70	22.9	2	4	3	13	7	7	25	6	13	6	92	26	21	22	23	39	17	11	11
251	20	1	181	80	24.4	4	1	2	5	6	3	20	8	8	4	108	30	25	28	25	24	6	7	11
119	19	1	185	76	22.2	2	11	3	3	7	2	20	8	8	4	72	18	18	18	18	27	9	10	8
123	21	2	175	60	19.6	3	1	3	9	5	4	19	7	9	3	95	21	25	24	25	23	7	8	8
132	18	1	183	76	22.7	3	2	3	11	3	6	20	8	8	4	120	30	30	30	30	29	9	11	9
225	20	2	170	61	21.1	2	11	3	4	9	5	19	6	11	2	89	24	26	16	23	21	8	10	3
252	20	2	170	60	20.8	1	3	3	1	8	4	22	7	11	4	91	24	21	23	23	25	10	9	6
134	21	1	183	78	23.3	2	8	3	0	3	6	23	9	9	5	76	19	21	18	18	29	10	10	9
106	8	1	132	52	29.8	5	1	1	3	3	0	10	4	4	2	24	6	6	6	6	12	12	0	0
116	10	2	148	36	16.4	5	11	2	3	0	2	10	4	4	2	120	30	30	30	30	6	1	3	2
116	9	1	136	24	13	5	11	2	3	4	1	10	4	4	2	112	30	30	29	23	6	1	5	0
139	14	1	173	56	18.7	4	1	3	2	4	2	20	10	8	2	67	15	19	16	17	27	10	10	7
275	12	2	161	45	17.4	4	15	2	7	1	0.5	12	4	6	2	120	30	30	30	30	14	4	6	4
252	20	1	180	85	26.2	3	3	3	7	14	7	30	12	12	6	72	18	18	18	18	30	10	10	10
128	11	1	150	37	16.4	5	2	2	7	5	1	15	4	9	2	70	23	25	13	9	17	2	12	3
259	20	2	167	55	19.7	3	6	3	8	5	3	26	10	12	4	96	24	24	24	24	16	3	9	4
126	15	2	165	54	19.8	4	8	2	2	3	2	21	7	12	2	83	25	25	17	16	24	8	8	8
166	20	1	179	70	21.8	4	10	2	1	5	2	30	12	12	6	105	25	25	29	26	45	11	15	19
224	20	1	180	79	24.4	5	6	2	8	8	4	10	4	4	2	110	30	25	26	29	41	11	16	14
242	11	2	157	39	15.8	4	6	2	6	2	1	12	4	6	2	81	26	22	18	15	11	5	4	2
244	20	1	178	70	22.1	3	5	3	7	13	5	24	8	12	4	94	22	25	24	23	37	15	13	9
224	20	2	168	60	21.3	3	6	3	6	2	5	12	6	4	2	109	30	29	24	26	6	5	0	1
123	13	2	166	52	18.9	3	1	2	2	2	1	17	8	7	2	95	22	27	23	23	10	3	2	5
162	13	1	198	80	20.4	4	1	2	3	2	0	10	4	4	2	120	30	30	30	30	52	12	20	20
203	20	2	180	80	24.7	3	11	3	9	3	5	10	4	4	2	102	30	24	26	22	18	6	6	6
136	20	2	182	80	24.2	2	10	3	2	2	7	10	4	4	2	86	23	19	21	23	32	10	11	11
145	11	1	152	38	16.4	4	13	2	2	3	0.5	24	10	11	3	84	22	23	22	17	27	9	9	9
142	14	2	165	62	22.8	3	2	2	8	6	0	24	9	13	2	98	25	23	24	26	25	5	13	7
113	14	2	177	61	19.5	2	13	2	4	4	1	10	4	4	2	115	30	30	27	28	5	1	2	2
130	13	2	166	50	18.1	3	4	2	7	3	2	13	5	6	2	105	30	29	21	25	17	3	9	5
142	22	2	168	50	17.7	3	2	3	0	7	3	10	4	4	2	72	18	18	18	18	44	14	15	15
111	24	2	175	65	21.2	3	7	2	7	4	7	10	4	4	2	83	30	20	18	15	18	5	8	5
240	20	1	188	75	21.2	3	12	2	6	6	6	34	13	15	6	120	30	30	30	30	14	4	8	2
105	22	1	192	88	23.9	3	10	2	6	6	3	20	8	8	4	48	12	12	12	12	19	9	5	5
146	11	1	154	36	15.2	5	1	1	1	1	1	22	10	10	2	91	22	23	23	23	34	12	11	11
290	20	1	178	70	22.1	4	2	2	11	11	5	32	13	12	7	94	26	25	26	17	34	12	15	7
122	18	1	179	68	21.2	3	1	2	3	5	3	15	6	7	2	72	18	18	18	18	27	10	9	8
248	20	1	171	62	21.2	4	8	3	2	6	7	10	4	4	2	94	24	24	24	22	16	3	6	7
267	20	1	175	80	26.1	4	2	3	5	8	5	10	4	4	2	56	6	14	14	22	45	10	17	18
256	20	2	153	48	20.5	4	2	3	3	4	4	21	8	9	4	76	23	19	19	15	21	8	7	6
133	23	1	190	90	24.9	2	7	3	2	10	6	26	13	8	5	84	18	21	21	24	27	6	8	13
102	18	1	188	85	24	3	10	3	3	0	5	10	4	4	2	109	29	28	27	25	8	8	0	0
169	20	2	165	60	22	3	1	3	1	8	5	20	8	8	4	90	22	23	23	22	21	7	7	7
140	24	1	194	96	25.5	2	4	2	4	5	6	20	8	8	4	94	22	24	24	24	29	9	10	10
133	23	1	191	90	24.7	2	7	3	6	4	7	20	8	8	4	96	24	24	24	24	30	9	10	11
143	19	1	175	70	22.9	3	11	3	5	6	3	20	8	8	4	68	18	17	16	17	37	10	14	13
221	20	2	173	65	21.7	3	14	3	9	8	4	19	7	8	4	96	24	24	24	24	20	6	8	6
275	20	2	168	60	21.3	3	15	3	2	5	6	10	4	4	2	72	18	18	18	18	30	10	10	10
174	20	1	180	73	22.5	3	2	1	3	8	7	23	9	12	2	74	18	18	20	18	30	10	10	10
222	20	1	188	83	23.5	2	17	2	10	10	3	25	11	11	3	73	20	23	17	13	19	7	7	5
187	20	1	181	79	24.1	2	12	2	2	9	7	33	11	14	8	57	13	17	16	11	30	10	10	10
118	16	2	167	57	20.4	3	2	1	4	3	3	21	7	12	2	95	23	28	26	18	9	6	2	1
128	20	2	168	55	19.5	3	2	2	4	3	7	15	7	6	2	92	23	23	23	23	34	10	11	13
150	7	1	125	25	16	5	17	1	4	5	0.5	27	10	14	3	73	18	18	18	19	33	11	11	11
237	20	2	156	55	22.6	3	5	2	1	9	4	20	7	11	2	79	20	24	17	18	24	8	10	6
123	12	2	158	36	14.4	5	1	1	0	4	1	12	4	6	2	98	29	27	24	18	15	7	5	3
114	13	1	176	61	19.7	4	7	2	5	0	1	10	4	4	2	102	30	30	28	14	6	2	2	2
191	20	2	165	65	23.9	2	12	3	7	3	7	23	12	9	2	86	20	24	26	16	34	12	7	15
154	21	1	193	100	26.8	3	14	2	9	4	5	31	12	15	4	78	18	20	20	20	31	9	9	13
114	20	2	174	60	19.8	3	7	3	1	6	4	29	12	12	5	72	18	18	18	18	28	10	7	11
277	20	1	184	80	23.6	2	2	3	10	12	3	30	10	12	8	93	27	28	18	20	31	14	11	6
206	20	1	180	75	23.1	2	15	3	7	5	7	37	17	18	2	75	17	21	15	22	47	14	19	14
129	14	2	174	63	20.8	2	10	1	14	5	4	22	12	8	2	79	19	24	22	14	11	4	6	1
126	19	2	170	63	21.8	3	8	3	6	4	2	23	13	8	2	105	21	29	27	28	29	9	10	10
116	22	1	185	80	23.4	3	11	2	2	6	4	20	8	8	4	48	12	12	12	12	19	9	5	5
270	20	1	180	72	22.2	2	2	2	12	0	0	16	6	8	2	60	18	10	12	20	48	15	16	17
74	25	1	180	87	26.9	3	4	3	2	7	4	20	8	9	3	64	12	18	15	19	26	6	9	11
113	13	2	158	57	22.8	4	13	2	4	2	2	10	4	4	2	120	30	30	30	30	5	4	1	0
116	21	2	180	58	17.9	4	11	1	2	4	5	30	12	12	6	86	21	22	22	21	35	10	13	12
245	20	2	200	100	25	5	3	3	3	6	7	10	4	4	2	104	18	30	26	30	16	4	8	4
113	23	2	172	56	18.9	3	13	3	4	7	5	19	8	9	2	93	24	24	22	23	16	7	5	4
247	20	2	169	57	20	4	6	3	4	4	5	20	8	8	4	78	19	20	19	20	30	10	10	10
217	20	2	182	65	19.6	2	6	2	1	10	5	26	10	12	4	116	27	30	29	30	30	6	13	11
133	17	1	187	82	23.4	3	7	2	8	5	1	16	6	8	2	78	23	24	17	14	21	5	10	6
224	20	1	171	65	22.2	3	6	2	7	9	4	31	9	20	2	86	19	30	23	14	24	9	13	2
194	20	1	182	72	21.7	3	6	3	1	9	4	30	12	12	6	72	18	18	18	18	30	10	10	10
126	20	1	190	86	23.8	1	8	3	4	6	3	14	4	8	2	82	24	22	17	19	16	6	5	5
139	15	2	168	62	22	3	1	2	6	6	2	26	10	14	2	92	23	23	25	21	23	10	8	5
121	16	1	177	80	25.5	3	1	3	9	3	1	10	4	4	2	70	23	18	15	14	23	9	5	9
256	20	1	178	72	22.7	2	2	3	1	4	7	21	11	8	2	99	27	23	24	25	28	13	5	10
208	20	2	161	51	19.7	3	8	3	7	10	6	30	14	12	4	94	21	24	21	28	26	10	10	6
330	20	1	176	92	29.7	4	15	3	6	6	3	28	10	14	4	98	25	27	24	22	52	12	20	20
163	20	1	183	72	21.5	2	7	3	0	12	5	20	8	8	4	48	12	12	12	12	19	9	5	5
108	20	1	175	65	21.2	3	11	3	2	2	2	14	6	6	2	76	24	22	15	15	5	2	3	0
127	11	2	153	90	38.4	4	10	2	11	9	1	27	8	15	4	75	18	22	17	18	16	5	5	6
138	21	1	175	65	21.2	2	14	3	12	3	4	27	9	14	4	109	27	29	28	25	29	7	9	13
100	22	1	183	84	25.1	2	16	3	4	3	6	12	5	5	2	88	22	24	21	21	17	4	7	6
148	16	1	183.5	68	20.2	3	16	1	5	7	5	22	8	11	3	88	19	24	24	21	30	9	10	11
266	20	1	190	85	23.5	3	10	2	2	7	6	28	12	12	4	63	16	13	19	15	33	10	11	12
304	20	1	181	75	22.9	3	6	2	5	8	3	37	12	20	5	120	30	30	30	30	49	12	18	19
102	9	1	135	29	15.9	5	10	1	0	1	0	10	4	4	2	24	6	6	6	6	8	8	0	0
235	11	1	150	41	18.2	5	8	2	10	3	2	12	4	6	2	115	30	30	28	27	4	0	4	0
207	20	2	178	70	22.1	3	16	3	10	3	2	27	12	11	4	81	21	20	20	20	30	10	12	8
98	10	1	150	35.5	15.8	5	7	2	5	4	0.5	24	10	12	2	76	18	19	23	16	38	12	14	12
119	12	1	158	38	15.2	4	11	2	3	3	0.5	16	6	8	2	114	30	29	27	28	7	6	0	1
162	12	1	156	49	20.1	5	1	2	3	3	1	39	13	16	10	71	19	23	20	9	27	11	10	6
121	12	2	166	57	20.7	4	1	2	7	1	1	12	4	6	2	104	30	30	22	22	9	1	2	6
130	11	2	146	34	16	5	4	1	4	5	0.5	13	4	7	2	99	30	23	26	20	19	5	8	6
115	11	1	148	42	19.2	5	1	1	3	1	0.5	14	8	4	2	68	17	18	16	17	7	5	1	1
149	12	1	170	65	22.5	5	11	2	7	6	1	25	10	13	2	69	13	19	14	23	32	12	10	10
157	9	2	140	25	12.8	5	3	1	4	4	1	28	10	15	3	91	21	24	23	23	35	10	12	13
119	9	1	140	29	14.8	5	11	1	7	2	0.5	18	7	9	2	97	28	30	26	13	3	3	0	0
134	8	1	132	28	16.1	5	8	1	5	1	1	15	4	9	2	103	29	26	27	21	25	10	8	7
115	10	2	140	28	14.3	5	1	1	3	0	1	10	4	4	2	116	30	30	30	26	13	4	1	8
132	17	1	178	75	23.7	4	2	2	3	6	1	10	4	4	2	72	18	18	18	18	26	8	9	9
130	9	1	140	28	14.3	5	4	1	4	4	1	15	7	6	2	73	18	18	19	18	17	6	8	3
129	17	1	179	64	20	3	10	2	4	2	3	16	6	8	2	90	22	28	20	20	13	5	5	3
141	17	1	182	78	23.5	4	1	2	2	5	1	22	8	11	3	100	27	29	20	24	23	8	6	9
121	15	1	176	74	23.9	4	1	2	5	3	0.5	10	4	4	2	100	30	30	17	23	11	1	1	9
106	10	2	150	50	22.2	5	1	1	18	3	0.5	10	4	4	2	24	6	6	6	6	6	5	1	0
136	10	2	148	83	37.9	4	10	1	7	2	0	17	6	9	2	120	30	30	30	30	21	4	8	9
112	11	1	150	30	13.3	5	2	1	4	2	0.5	19	7	8	4	72	18	18	18	18	23	9	8	6
106	13	2	170	55	19	3	1	2	2	3	1	10	4	4	2	120	30	30	30	30	4	4	0	0
127	18	1	188	80	22.6	3	10	3	1	5	1	21	9	10	2	78	21	24	16	17	10	5	4	1
117	14	1	162	50	19.1	4	14	2	3	3	2	20	8	8	4	93	24	24	24	21	22	7	8	7
115	11	1	150	41	18.2	5	1	1	5	3	1	12	4	6	2	80	28	24	16	12	5	5	0	0
224	20	1	177	77	24.6	3	6	2	1	10	6	27	9	12	6	72	18	18	18	18	30	10	10	10
133	21	1	177	65	20.7	2	7	2	0	4	5	20	8	9	3	96	24	24	24	24	36	13	11	12
193	20	1	181	75	22.9	4	2	1	3	9	5	10	4	4	2	96	24	24	22	26	9	5	2	2
229	20	1	188	86	24.3	3	14	2	1	14	2	38	17	14	7	85	20	21	22	22	36	9	13	14
237	20	2	169	62	21.7	3	5	2	1	9	4	26	12	12	2	72	18	18	18	18	30	10	10	10
142	10	1	140	30	15.3	5	2	1	5	2	2	21	10	8	3	71	16	18	19	18	31	14	10	7
129	13	2	166	50	18.1	4	10	1	6	6	0.5	16	7	7	2	110	26	30	28	26	23	11	8	4
134	15	2	170	62.5	21.6	3	8	2	1	6	3	15	5	8	2	83	26	20	19	18	23	8	9	6
161	20	2	168	63	22.3	3	11	2	2	2	5	10	4	4	2	120	30	30	30	30	8	8	0	0
111	12	1	162	58	22.1	5	7	2	6	5	0.5	11	5	4	2	74	24	20	16	14	4	4	0	0
212	9	1	147	40	18.5	5	12	1	2	3	3	13	6	5	2	103	21	29	26	27	11	3	6	2
206	21	1	172	70	23.7	5	15	1	11	14	7	27	11	11	5	68	18	17	17	16	28	11	9	8
139	9	2	135	32	17.6	5	1	1	5	5	0.5	13	5	6	2	98	22	26	26	24	32	10	11	11
135	14	1	183	66	19.7	3	2	2	1	3	1	19	8	9	2	102	25	27	27	23	20	6	8	6
126	14	2	170	55	19	4	8	2	2	3	0.5	10	4	4	2	120	30	30	30	30	20	8	3	9
118	14	1	175	54	17.6	4	2	2	0	3	2	16	6	8	2	89	22	23	25	19	16	6	7	3
141	13	1	166	52	18.9	4	1	2	9	0	1	18	7	9	2	116	29	30	30	27	27	11	8	8
236	21	1	167	65	23.3	5	11	1	3	4	7	20	8	8	4	53	12	12	12	17	30	11	8	11
122	14	1	176	53	17.1	4	1	2	4	2	1	13	5	6	2	79	24	24	20	11	13	6	3	4
122	13	1	180	80	24.7	5	1	1	2	4	2	10	4	4	2	104	30	26	26	22	20	12	4	4
218	21	1	193	76	20.4	3	10	2	1	3	4	18	4	12	2	72	18	18	18	18	30	10	10	10
135	14	1	182	55	16.6	4	2	2	9	2	2	18	8	8	2	87	24	22	22	19	19	6	9	4
291	21	1	188	77	21.8	2	9	3	12	9	5	19	7	8	4	64	12	18	17	17	30	10	10	10
132	13	2	165	54	19.8	3	2	2	5	3	2	18	6	8	4	112	30	30	26	26	14	4	5	5
136	15	2	169	54	18.9	4	10	2	3	4	3	22	8	11	3	87	21	22	21	23	22	11	6	5
255	21	1	186	71	20.5	3	11	3	1	2	4	18	8	8	2	96	24	23	24	25	25	4	9	12
140	13	1	180	67	20.7	4	4	2	3	3	2	24	10	11	3	72	18	18	18	18	22	7	7	8
120	15	1	179	71	22.2	4	2	2	1	5	4	14	5	7	2	97	24	23	26	24	14	3	6	5
227	21	1	180	65	20.1	4	8	2	2	4	4	10	4	4	2	120	30	30	30	30	25	6	7	12
125	13	2	174	64	21.1	4	1	1	1	2	1	15	4	9	2	72	18	18	18	18	27	9	8	10
140	14	1	172	52	17.6	4	4	2	0	3	3	23	10	11	2	79	24	24	16	15	25	11	7	7
142	15	2	174	65	21.5	3	2	2	2	6	1	20	8	9	3	53	15	14	11	13	30	11	10	9
141	14	1	176	73.5	23.7	5	1	2	1	4	2	24	10	12	2	78	19	20	20	19	25	8	7	10
110	14	1	169	61	21.4	4	1	2	0	1	1	10	4	4	2	108	29	27	26	26	0	0	0	0
119	7	1	127	28	17.4	5	11	1	6	2	2	10	4	4	2	120	30	30	30	30	15	11	0	4
231	21	2	172	61	20.6	2	11	3	0	7	6	20	8	10	2	96	24	24	24	24	37	11	14	12
120	10	2	142	31	15.4	5	2	1	1	3	0	10	4	4	2	88	24	23	22	19	12	4	5	3
140	14	1	165	60	22	5	4	1	7	6	0	26	14	10	2	91	24	24	22	21	30	12	9	9
138	15	1	173	56.8	19	5	14	2	7	2	3	20	8	10	2	84	23	23	21	17	26	12	8	6
158	16	2	171	58	19.8	3	1	2	10	9	2	35	19	14	2	87	22	24	19	22	29	12	10	7
253	21	1	189	77	21.6	3	11	3	6	1	5	10	4	4	2	99	28	24	25	22	30	10	10	10
129	16	2	169.7	65	22.6	4	10	3	5	5	3	20	9	9	2	82	23	24	17	18	13	8	1	4
109	11	2	164	37.8	14.1	5	1	1	1	0	2	10	4	4	2	88	24	26	19	19	1	1	0	0
115	13	1	167	49	17.6	4	1	2	5	4	1	10	4	4	2	115	30	29	27	29	7	2	3	2
239	21	1	194	101	26.8	3	14	3	6	9	4	17	4	11	2	104	30	28	20	26	18	3	8	7
134	16	1	185	74.5	21.8	4	8	3	4	5	4	14	4	8	2	108	29	30	28	21	24	9	9	6
222	21	2	185	78	22.8	3	17	3	1	4	3	25	10	11	4	94	24	22	24	24	21	6	8	7
224	21	2	169	65	22.8	4	6	3	4	7	7	24	10	12	2	71	17	16	17	21	32	9	15	8
117	16	2	168	62	22	4	14	3	1	5	4	14	7	5	2	106	30	26	25	25	5	2	1	2
130	14	1	185	69	20.2	5	4	1	3	2	1	20	8	8	4	98	30	21	26	21	14	6	4	4
112	15	1	175	59	19.3	4	2	3	6	1	3	11	4	5	2	116	30	30	30	26	7	5	0	2
226	21	1	186	75	21.7	3	2	2	5	5	5	26	11	13	2	79	23	24	18	14	28	14	10	4
254	21	2	163	50	18.8	5	14	1	6	4	5	19	10	7	2	96	24	24	24	24	21	9	8	4
187	21	2	170	57	19.7	3	12	3	12	6	2	23	10	11	2	85	25	21	24	15	44	14	15	15
148	15	2	172	60	20.3	4	16	3	4	4	5	26	11	12	3	72	18	18	18	18	30	10	10	10
176	21	1	193	90	24.2	3	12	3	3	4	7	15	7	5	3	93	28	21	24	20	30	8	7	15
128	11	1	168	55.5	19.7	5	2	2	0	1	2	21	9	10	2	91	16	27	22	26	19	8	2	9
146	13	2	163.5	53	19.8	4	1	1	4	6	1	25	11	12	2	79	21	24	19	15	28	10	9	9
130	15	2	165	52	19.1	4	4	2	12	3	3	18	6	10	2	113	30	30	24	29	17	8	4	5
151	14	2	173.5	51	16.9	3	8	1	11	2	1	25	7	16	2	109	30	28	23	28	30	7	16	7
248	21	2	169	60	21	3	8	3	8	8	4	29	11	16	2	96	24	24	24	24	17	4	7	6
140	15	2	170	60	20.8	4	4	2	5	5	6	23	9	12	2	71	19	18	18	16	29	11	10	8
138	9	1	142	45	22.3	5	14	1	12	5	0	20	9	9	2	93	27	26	18	22	22	8	8	6
137	6	2	125	24	15.4	5	2	1	2	2	0.5	19	8	9	2	71	18	18	17	18	26	10	8	8
148	11	2	143	33	16.1	5	16	1	2	4	0.5	26	12	12	2	72	18	18	18	18	30	10	10	10
121	6	1	125	23	14.7	5	1	1	1	4	0	10	4	4	2	96	24	24	24	24	15	5	5	5
131	10	2	137	43	22.9	5	11	1	1	4	0	20	8	10	2	120	30	30	30	30	11	5	2	4
112	6	1	128	34	20.8	5	2	1	11	2	0.5	10	4	4	2	104	30	29	25	20	2	2	0	0
129	12	1	153	31	13.2	5	10	1	2	5	2	16	10	4	2	82	23	22	19	18	19	8	6	5
116	6	2	118	20.6	14.8	5	11	1	0	3	0.5	13	5	6	2	120	30	30	30	30	3	0	1	2
128	7	2	128	50	30.5	5	2	1	2	3	0.5	21	8	11	2	79	20	20	20	19	17	9	5	3
119	7	1	126	25	15.7	5	11	1	3	1	3	10	4	4	2	72	18	18	18	18	17	8	6	3
140	9	1	133	25	14.1	5	4	1	7	7	3	18	8	8	2	58	10	15	19	14	32	13	11	8
146	10	1	146	35	16.4	5	1	1	3	4	2	29	11	15	3	94	22	24	24	24	25	10	8	7
125	9	1	143	40	19.6	5	1	1	4	2	2	16	7	7	2	100	25	29	22	24	16	7	5	4
162	6	1	118	22	15.8	5	1	1	3	2	1	10	4	4	2	117	27	30	30	30	52	12	20	20
110	8	1	137	30	16	5	1	1	1	2	2	10	4	4	2	99	30	27	23	19	4	4	0	0
124	11	2	157	44	17.9	3	11	1	0	1	0	15	6	7	2	52	19	11	10	12	15	6	4	5
119	10	1	143	30	14.7	5	11	1	6	2	1	11	4	5	2	84	18	22	23	21	14	7	3	4
149	6	2	113	20	15.7	5	11	1	7	7	0	31	12	17	2	71	16	17	20	18	33	12	8	13
127	9	1	135	45	24.7	5	10	1	6	2	1	13	6	5	2	92	25	23	23	21	14	6	5	3
160	9	2	140	40	20.4	5	2	1	4	3	2	28	15	11	2	90	22	26	23	19	38	14	14	10
129	8	2	138	27	14.2	5	10	1	5	3	0.5	20	8	10	2	96	24	24	24	24	17	9	4	4
119	7	1	135	28	15.4	5	11	1	0	3	0.5	13	4	7	2	86	24	24	23	15	8	4	1	3
44	10	2	135	28	15.4	5	1	1	6	1	1	11	5	4	2	120	30	30	30	30	15	10	3	2
132	9	2	130	25	14.8	5	2	1	3	2	2	28	12	13	3	78	19	21	19	19	32	11	10	11
166	7	2	132	25	14.3	5	10	1	9	4	0.5	14	4	4	6	112	22	30	30	30	52	12	20	20
102	7	2	130	37	21.9	5	10	1	6	0	2	10	4	4	2	120	30	30	30	30	8	8	0	0
119	7	2	135	25.5	14	5	11	1	3	3	0	14	7	5	2	71	21	24	10	16	7	5	2	0
143	10	1	142	28	13.9	5	11	1	9	3	1	23	11	10	2	76	21	18	18	19	38	10	13	15
114	6	1	120	22.5	15.6	5	7	1	6	2	1	10	4	4	2	78	28	24	18	8	4	4	0	0
106	8	2	130	29	17.2	5	1	1	2	1	1	10	4	4	2	118	30	30	30	28	6	5	0	1
152	10	2	140	30	15.3	5	1	1	0	6	7	30	12	12	6	72	18	18	18	18	30	10	10	10
125	6	1	110	20	16.5	5	1	1	5	1	0.5	10	4	4	2	80	30	14	17	19	27	13	7	7
127	7	2	128	23	14	5	10	1	0	2	0.5	16	7	7	2	101	25	26	25	25	16	5	4	7
140	10	2	137	43	22.9	5	4	1	7	4	0	12	6	4	2	120	30	30	30	30	28	8	12	8
210	21	1	178	74	23.4	3	4	3	6	4	3	24	10	12	2	88	20	24	21	23	23	8	7	8
123	9	2	140	32.1	16.4	5	1	1	0	0	0.5	17	6	8	3	62	13	17	18	14	16	8	4	4
131	9	1	140	25	12.8	5	11	1	3	0	0	14	8	4	2	96	20	27	25	24	23	5	9	9
121	6	1	118	20	14.4	5	1	1	6	3	0.5	14	4	8	2	86	29	29	15	13	7	5	2	0
115	8	2	135	34	18.7	5	1	1	1	4	2	10	4	4	2	71	16	18	19	18	15	9	2	4
124	8	2	131	25	14.6	5	11	1	0	1	0.5	10	4	4	2	95	22	28	20	25	16	6	3	7
121	6	2	123	23.5	15.5	5	1	1	0	2	0.5	14	7	5	2	68	9	21	15	23	21	11	5	5
111	8	1	142	38	18.8	4	7	1	3	0	1	10	4	4	2	110	30	30	26	24	9	6	3	0
139	12	1	160	56	21.9	5	1	1	4	1	0	23	12	9	2	68	12	17	21	18	24	9	7	8
124	8	1	128	25	15.3	5	11	1	7	0	1	19	11	6	2	110	30	28	28	24	15	6	4	5
129	8	2	120	50	34.7	5	10	1	3	3	2	22	10	10	2	70	16	18	18	18	17	9	5	3
110	10	1	148	40	18.3	5	1	1	6	2	0	10	4	4	2	104	30	30	26	18	0	0	0	0
122	10	2	150	37	16.4	5	1	2	2	2	0.5	16	5	9	2	93	29	24	21	19	10	3	6	1
134	12	2	158	40	16	4	8	2	2	1	0.5	22	9	11	2	87	24	22	22	19	26	9	8	9
253	21	1	178	72	22.7	2	11	2	2	5	7	30	9	16	5	96	24	24	24	24	19	7	7	5
114	20	1	178	74	23.4	3	7	3	3	3	2	10	4	4	2	120	30	30	30	30	8	2	0	6
246	21	2	170	60	20.8	2	13	3	9	6	3	26	12	11	3	89	22	22	23	22	22	5	11	6
118	19	2	180	78	24.1	3	2	3	4	2	3	10	4	4	2	107	30	30	22	25	10	5	5	0
117	19	2	170	57	19.7	3	14	3	1	5	4	13	4	7	2	82	24	21	21	16	8	5	2	1
230	21	1	184	81	23.9	2	2	2	8	9	3	35	10	18	7	83	21	22	23	17	45	13	16	16
214	21	1	176	76	24.5	2	9	3	4	10	7	13	6	5	2	86	29	27	15	15	5	1	3	1
139	19	2	170	62	21.5	3	1	3	14	3	5	24	7	13	4	82	22	23	21	16	34	16	13	5
118	21	1	181	78	23.8	3	2	3	15	2	3	10	4	4	2	120	30	30	30	30	8	8	0	0
258	21	1	180	80	24.7	4	14	2	9	8	7	27	12	12	3	80	18	20	21	21	33	12	9	12
260	21	1	184	64	18.9	3	17	3	5	2	5	27	11	14	2	94	23	24	24	23	33	11	12	10
205	21	2	158.5	48	19.1	3	2	3	1	5	5	30	12	12	6	72	18	18	18	18	30	10	10	10
132	20	2	168	55	19.5	3	2	3	2	4	5	10	4	4	2	72	18	18	18	18	30	10	10	10
121	19	1	181	75	22.9	2	1	3	2	11	7	24	6	13	5	50	12	12	14	12	19	9	5	5
134	20	1	181	75	22.9	3	8	3	6	4	7	19	7	8	4	82	16	25	22	19	27	9	9	9
119	21	2	172	69	23.3	4	11	2	3	4	4	12	6	4	2	92	24	24	25	19	19	9	5	5
110	21	2	176	69	22.3	3	1	3	4	13	2	22	9	10	3	84	22	23	21	18	23	10	7	6
132	20	1	178	74	23.4	4	2	1	11	7	7	14	4	8	2	106	22	29	28	27	27	10	8	9
183	21	2	165	67	24.6	2	4	3	12	10	4	34	14	16	4	70	17	15	19	19	30	11	11	8
140	19	2	173	62	20.7	3	4	3	2	5	4	27	8	15	4	93	24	23	23	23	30	10	10	10
266	21	1	170	95	32.9	4	10	2	9	4	7	24	14	8	2	108	26	30	26	26	26	3	9	14
160	21	2	168	60	21.3	4	2	2	1	5	7	24	10	12	2	107	30	26	26	25	42	12	13	17
222	21	1	184	94	27.8	2	17	3	6	2	7	16	5	9	2	83	19	23	22	19	41	14	10	17
124	22	2	168	60	21.3	3	11	3	1	2	3	12	5	5	2	80	26	24	14	16	25	5	8	12
262	21	1	187	84	24	4	10	2	9	6	4	26	10	14	2	94	20	27	23	24	39	11	14	14
249	21	2	180	63	19.4	2	14	3	6	4	6	28	8	16	4	96	24	24	24	24	41	11	15	15
258	21	1	188	90	25.5	2	14	3	4	15	5	20	8	8	4	62	17	16	16	13	28	11	10	7
263	22	1	184	77	22.7	2	2	2	6	9	7	21	8	10	3	99	26	30	22	21	28	8	14	6
352	22	1	178	88	27.8	4	17	3	9	4	2	50	20	20	10	120	30	30	30	30	52	12	20	20
197	22	1	176	58	18.7	1	12	1	4	8	3	19	7	7	5	81	21	21	21	18	28	12	8	8
225	22	1	178	77	24.3	3	11	3	5	2	4	12	4	6	2	104	26	30	22	26	13	3	4	6
210	22	2	164	48	17.8	4	4	2	1	5	4	26	9	13	4	90	24	23	22	21	31	11	9	11
143	24	1	185	70	20.5	3	11	3	3	4	7	22	9	9	4	105	30	23	26	26	25	7	8	10
291	22	1	183	70	20.9	2	9	3	2	7	3	22	8	12	2	69	17	19	18	15	27	9	8	10
246	22	2	176	78	25.2	2	13	3	9	3	6	26	9	12	5	84	17	22	24	21	18	6	6	6
144	17	2	175	57	18.6	3	9	2	5	11	7	26	11	13	2	107	23	29	30	25	24	5	15	4
242	22	2	174	63	20.8	2	6	2	8	5	5	32	10	15	7	93	22	23	24	24	24	7	9	8
276	22	1	177	70	22.3	4	10	3	1	5	2	28	12	12	4	109	29	24	28	28	37	9	14	14
119	17	2	179	67	20.9	1	11	2	2	9	4	20	8	10	2	72	18	18	18	18	27	9	9	9
108	21	2	174	69	22.8	3	11	3	4	2	6	19	9	8	2	94	24	23	25	22	30	10	10	10
128	20	2	170.5	57.6	19.8	3	2	2	1	8	5	10	4	4	2	71	18	17	18	18	24	8	8	8
226	22	2	171	64	21.9	2	2	2	1	5	7	20	8	10	2	106	30	29	22	25	21	6	7	8
231	22	1	178	79	24.9	2	11	2	5	9	4	33	12	14	7	86	18	26	20	22	29	9	7	13
215	22	1	182	71	21.4	4	11	2	2	6	4	19	5	10	4	98	29	29	19	21	15	8	2	5
143	16	2	168	55	19.5	4	11	2	2	4	3	23	10	11	2	76	20	19	21	16	28	10	12	6
139	21	2	170	58	20.1	4	1	2	4	9	5	26	16	8	2	89	19	23	24	23	21	7	4	10
181	22	1	185	77	22.5	2	8	3	3	8	7	30	12	12	6	72	18	18	18	18	30	10	10	10
42	23	1	180	70	21.6	4	11	1	2	2	1	10	4	4	2	62	15	19	13	15	2	2	0	0
249	22	2	160	51	19.9	3	14	3	5	4	4	16	4	10	2	103	27	28	23	25	28	6	10	12
207	22	2	168	62	22	3	16	3	5	5	7	31	10	17	4	84	15	22	27	20	35	10	19	6
104	19	2	162	48	18.3	3	10	2	1	4	4	18	8	8	2	95	24	24	24	23	25	8	10	7
256	22	1	181	95	29	3	2	3	3	12	7	31	10	14	7	87	24	21	20	22	38	10	15	13
248	22	2	170	59	20.4	1	8	3	7	6	5	25	10	13	2	83	21	21	17	24	29	9	12	8
218	22	1	181	73	22.3	4	10	2	6	4	7	26	4	20	2	116	30	28	30	28	25	8	7	10
182	22	2	165	65	23.9	4	2	3	6	4	7	17	7	8	2	86	19	23	23	21	8	4	2	2
232	22	1	185	80	23.4	3	11	3	15	1	6	20	4	10	6	120	30	30	30	30	7	2	4	1
222	22	1	180	96	29.6	4	17	1	2	0	7	22	16	4	2	112	30	26	30	26	14	0	2	12
246	22	1	170	61	21.1	5	13	1	11	8	7	27	12	10	5	68	16	19	15	18	31	10	13	8
164	19	1	185	75	21.9	3	14	2	3	8	6	12	4	6	2	96	26	25	23	22	52	12	20	20
125	13	2	164	50	18.6	3	1	2	4	2	1	15	5	8	2	87	25	22	22	18	20	10	6	4
144	18	2	170	71	24.6	3	9	2	5	2	4	10	4	4	2	93	24	24	23	22	38	12	12	14
132	16	1	190	77	21.3	2	2	2	8	4	5	18	7	9	2	108	27	30	27	24	16	5	6	5
131	13	1	165	55	20.2	4	11	2	5	4	2	21	8	11	2	80	19	21	22	18	24	11	7	6
220	22	1	190	93	25.8	2	2	3	7	9	2	31	11	14	6	91	21	24	22	24	35	11	12	12
124	14	1	171	63	21.5	3	11	2	12	7	4	18	4	12	2	66	21	11	19	15	16	2	11	3
272	22	1	190	90	24.9	4	2	1	6	8	5	28	9	14	5	84	21	21	21	21	37	9	15	13
240	23	1	180	75	23.1	5	12	2	0	6	1	13	7	4	2	106	30	26	26	24	27	9	9	9
267	23	2	173	63	21	2	2	3	1	8	3	35	14	14	7	84	21	21	22	20	37	11	13	13
133	13	2	150	45	20	4	7	2	4	9	2	22	9	11	2	57	11	13	18	15	27	7	14	6
206	23	1	175	60	19.6	4	15	1	5	11	6	29	11	12	6	67	17	17	17	16	28	11	10	7
136	23	2	168	60	21.3	4	10	3	6	5	3	24	10	12	2	89	23	24	21	21	27	10	10	7
201	23	2	174	72	23.8	1	8	3	1	6	5	22	10	8	4	81	24	21	20	16	30	8	12	10
214	23	2	171	64	21.9	2	9	3	10	4	6	30	12	15	3	77	20	21	19	17	26	11	11	4
145	20	2	165	53	19.5	3	13	2	11	6	5	29	12	14	3	120	30	30	30	30	23	5	10	8
178	23	1	180	72	22.2	3	11	2	3	3	4	31	15	13	3	72	18	18	18	18	30	10	10	10
136	20	1	174	60	19.8	3	10	3	6	5	6	20	8	8	4	96	24	24	24	24	22	9	6	7
223	23	2	167	55	19.7	3	11	3	1	4	1	30	12	12	6	72	18	18	18	18	30	10	10	10
171	19	2	163	55	20.7	2	7	3	9	9	3	37	14	18	5	54	22	14	12	6	40	15	16	9
183	23	1	188	87	24.6	2	4	3	2	2	3	13	4	7	2	83	24	22	20	17	19	8	5	6
217	23	1	193	99	26.6	3	6	3	2	6	4	32	14	13	5	77	19	16	20	22	32	10	10	12
102	23	1	180	68	21	4	10	2	0	4	4	10	4	4	2	24	6	6	6	6	8	8	0	0
105	16	1	180	70	21.6	2	10	3	7	4	4	10	4	4	2	68	16	29	10	13	4	2	2	0
214	23	2	180	80	24.7	2	9	3	3	6	7	26	8	12	6	72	18	18	18	18	30	10	10	10
273	23	1	189	100	28	2	16	3	10	4	7	44	14	20	10	85	22	22	18	23	30	10	10	10
161	22	1	177	80	25.5	3	11	3	10	10	7	33	12	16	5	91	20	21	26	24	32	11	10	11
118	22	2	160	52	20.3	3	2	2	1	2	3	10	4	4	2	108	30	29	27	22	8	3	0	5
150	19	1	180	70	21.6	3	17	3	1	5	3	19	4	9	6	97	24	26	24	23	41	14	13	14
216	23	1	192	80	21.7	2	4	3	1	7	7	20	8	8	4	72	18	18	18	18	28	9	9	10
160	20	1	190	80	22.2	4	2	1	10	8	5	32	12	12	8	70	26	15	18	11	45	16	11	18
138	21	1	180	85	26.2	3	14	2	6	6	2	21	10	9	2	81	17	21	21	22	29	9	9	11
184	23	1	190	77	21.3	3	14	3	1	4	6	24	12	8	4	77	18	19	21	19	30	10	10	10
251	23	1	178	70	22.1	3	1	3	3	5	1	20	8	8	4	72	18	18	18	18	30	10	10	10
137	22	1	181	78	23.8	5	2	1	3	5	2	30	15	10	5	76	18	17	20	21	32	10	12	10
237	23	2	170	55	19	3	5	2	11	4	5	33	14	17	2	84	17	25	22	20	44	13	20	11
157	22	1	178	82	25.9	3	3	3	3	10	4	22	4	12	6	88	24	24	21	19	41	12	15	14
128	21	1	178	75	23.7	4	2	2	2	5	4	15	4	9	2	103	30	24	26	23	21	7	7	7
238	23	1	181	81	24.7	3	8	3	3	5	4	27	11	12	4	95	24	24	24	23	30	9	10	11
150	20	1	175	67.5	22	4	17	3	12	6	4	31	10	18	3	117	30	30	30	27	25	14	8	3
184	23	1	185	65	19	3	14	3	10	0	7	10	4	4	2	110	30	30	26	24	32	9	14	9
212	24	1	183	75	22.4	3	12	3	3	4	2	20	8	8	4	72	18	18	18	18	22	12	5	5
246	24	1	175	83	27.1	3	13	2	2	8	5	30	12	12	6	72	18	18	18	18	30	10	10	10
300	24	1	178	80	25.2	3	11	2	1	4	4	30	12	12	6	72	18	18	18	18	30	10	10	10
219	24	1	192	88	23.9	2	9	3	3	5	4	30	12	12	6	72	18	18	18	18	30	10	10	10
242	24	1	173	70	23.4	3	6	2	12	3	7	10	4	4	2	120	30	30	30	30	18	5	6	7
133	21	1	185	80	23.4	3	7	2	2	7	4	20	8	8	4	89	24	24	22	19	19	6	6	7
257	24	1	184	76	22.4	3	2	3	6	9	7	31	11	14	6	98	30	26	24	18	6	0	0	6
137	21	1	184.9	76	22.2	3	2	3	4	6	3	18	10	6	2	69	14	19	16	20	29	5	14	10
220	24	2	172	67	22.6	3	2	3	3	2	6	15	7	6	2	84	26	23	15	20	9	1	4	4
248	25	1	180	74.7	23.1	4	8	2	10	8	7	23	7	12	4	96	25	24	22	25	23	8	7	8
143	19	1	178	67	21.1	4	11	2	4	6	7	17	6	9	2	93	21	24	24	24	30	10	12	8
100	20	2	168	59	20.9	4	16	2	2	3	4	10	4	4	2	91	23	23	21	24	29	9	10	10
132	15	1	168	58	20.5	3	2	2	6	2	0.5	23	8	12	3	73	18	20	19	16	22	9	9	4
127	14	1	175	60	19.6	3	10	2	2	4	0.5	17	8	7	2	78	20	25	16	17	14	6	5	3
129	15	1	183	70	20.9	4	10	1	6	7	0.5	27	10	14	3	80	20	20	20	20	40	13	16	11
127	16	1	180	59	18.2	4	10	1	5	4	1	14	4	8	2	84	20	24	20	20	21	11	6	4
132	15	1	186	69	19.9	3	2	1	5	6	0.5	18	7	9	2	91	23	26	22	20	25	7	11	7
217	25	2	173	56	18.7	3	6	3	4	4	7	21	6	13	2	108	30	26	27	25	25	8	7	10
129	18	1	185	74	21.6	3	10	3	2	11	0.5	10	4	4	2	120	30	30	30	30	25	8	10	7
237	25	2	170	55	19	3	5	3	4	8	6	21	11	8	2	95	24	24	24	23	31	8	12	11
124	16	2	170	57	19.7	2	11	2	8	8	4	19	6	11	2	86	24	24	20	18	17	8	5	4
147	25	1	181	71	21.7	3	2	3	9	5	7	23	7	11	5	118	30	30	30	28	36	10	13	13
127	25	1	188	100	28.3	4	10	1	5	7	4	23	8	10	5	89	23	24	21	21	21	9	5	7
118	20	1	178	72	22.7	4	2	1	3	3	7	10	4	4	2	24	6	6	6	6	16	4	8	4
101	20	2	168	59	20.9	4	1	2	1	3	3	10	4	4	2	72	18	18	18	18	30	9	11	10
192	26	1	170	60	20.8	5	3	1	1	10	5	21	9	8	4	81	23	20	20	18	26	9	9	8
267	26	1	190	80	22.2	1	2	2	1	4	1	30	12	12	6	72	18	18	18	18	30	10	10	10
211	26	2	158	60	24	3	11	2	14	8	6	32	16	14	2	91	24	24	21	22	37	13	13	11
244	26	1	188	90	25.5	4	5	1	13	6	3	35	15	16	4	88	24	23	22	19	20	8	7	5
330	26	1	190	85	23.5	3	15	3	1	5	7	30	12	12	6	120	30	30	30	30	52	12	20	20
127	20	1	173	61	20.4	3	10	3	5	4	7	18	8	8	2	120	30	30	30	30	19	7	5	7
237	26	1	191	90	24.7	2	5	2	2	6	5	20	6	10	4	89	24	21	23	21	19	10	5	4
278	26	1	185	80	23.4	3	2	3	1	4	4	10	4	4	2	96	24	24	24	24	41	11	15	15
118	9	2	141	37	18.6	5	2	1	5	2	0	10	4	4	2	119	30	30	29	30	8	3	2	3
126	12	2	160	50	19.5	4	8	2	1	4	2	15	7	6	2	92	25	24	22	21	15	5	5	5
119	16	1	168	53	18.8	3	11	2	6	4	1	13	5	6	2	106	30	30	18	28	6	1	3	2
125	17	1	182	72	21.7	4	1	2	1	1	1	10	4	4	2	90	17	25	24	24	17	8	2	7
151	13	1	173	60	20	4	8	2	3	2	1	30	8	12	10	83	19	21	20	23	25	7	9	9
118	13	1	172	56	18.9	4	2	2	3	9	4	12	4	6	2	86	27	24	18	17	13	5	5	3
125	12	2	158	50	20	4	1	2	8	13	7	18	9	7	2	85	18	23	22	22	23	14	5	4
142	21	1	185	80	23.4	3	2	3	1	5	2	20	8	8	4	96	24	24	24	24	30	10	10	10
111	16	1	185	73	21.3	2	7	3	5	3	2	12	5	5	2	91	23	23	23	22	7	4	1	2
129	13	2	160	51	19.9	4	10	2	1	2	0.5	16	6	8	2	89	23	24	22	20	19	8	5	6
115	11	2	162	42	16	4	1	1	0	4	2	14	6	6	2	91	21	24	22	24	17	12	0	5
137	13	1	175	55	18	4	2	2	7	3	0.5	13	4	7	2	100	25	26	26	23	26	7	12	7
127	12	1	173	51	17	4	10	2	1	1	2	18	10	6	2	79	19	23	20	17	17	5	7	5
120	12	2	158	48	19.2	4	2	1	0	0	1	12	4	6	2	111	30	28	25	28	8	2	2	4
115	12	2	167	52	18.6	4	1	1	3	4	1	12	5	5	2	89	23	25	24	17	10	6	1	3
144	12	2	165	50	18.4	4	9	2	5	3	3	22	10	10	2	72	18	18	18	18	26	7	9	10
151	12	2	145	34	16.2	4	8	1	2	5	4	22	11	9	2	86	17	20	24	25	54	18	18	18
116	10	2	140	30	15.3	5	11	2	0	3	0.5	11	4	5	2	88	20	28	16	24	5	4	0	1
144	15	2	165	55	20.2	4	9	2	5	5	1	17	6	9	2	96	24	24	24	24	33	11	11	11
143	6	2	119	23	16.2	5	11	1	1	3	1	23	11	10	2	85	21	24	21	19	28	9	10	9
149	19	2	170	68	23.5	3	11	2	18	8	6	28	10	13	5	95	28	24	22	21	34	16	12	6
111	25	2	168	55	19.5	3	7	3	2	5	0	20	8	8	4	94	22	24	24	24	21	7	8	6
123	10	1	140	32	16.3	5	1	1	1	2	0	20	7	11	2	69	14	22	12	21	9	6	2	1
136	13	1	180	62	19.1	4	10	1	1	6	2	22	8	12	2	74	18	20	18	18	24	10	9	5
111	9	1	138	34	17.9	5	7	1	2	1	0	11	5	4	2	86	26	27	7	26	0	0	0	0
115	13	1	150	33	14.7	5	1	1	6	0	0.5	12	4	6	2	90	30	30	15	15	3	0	0	3
143	11	1	156	61	25.1	5	11	1	4	2	1	24	10	12	2	80	20	19	21	20	23	9	6	8
172	7	1	128	43	26.2	5	14	1	3	1	0.5	20	8	8	4	111	30	29	26	26	52	12	20	20
120	10	1	144	35	16.9	5	2	1	3	4	1	16	5	9	2	65	20	19	17	9	12	5	3	4
130	10	2	152	36	15.6	5	4	1	4	4	2	21	9	10	2	81	22	22	16	21	17	10	6	1
117	9	1	135	30	16.5	5	14	1	0	1	2	10	4	4	2	103	29	27	20	27	7	2	3	2
128	11	1	145	41	19.5	5	2	1	7	1	1	16	8	6	2	120	30	30	30	30	18	6	3	9
112	7	1	130	26	15.4	5	2	1	9	1	0.5	10	4	4	2	62	21	12	14	15	10	8	0	2
125	9	2	155	40	16.6	5	1	1	3	4	3	21	12	6	3	79	14	19	22	24	16	9	4	3
135	13	1	170	57	19.7	3	2	2	7	3	2	20	9	9	2	82	27	23	15	17	17	5	6	6
113	10	1	150	36	16	5	13	2	4	5	1	23	10	11	2	56	15	15	13	13	21	10	6	5
128	13	2	163	50	18.8	3	2	2	6	3	1	22	10	10	2	80	20	21	22	17	16	4	7	5
138	13	1	165	50	18.4	4	14	2	6	6	2	22	9	11	2	89	20	28	23	18	21	10	8	3
126	14	1	175	57	18.6	3	8	1	5	5	4	17	5	10	2	91	23	26	22	20	13	3	10	0
