# Supplementary material for: The relationship between diet, sleep, screen time, stress coping strategies with psychological strain and athlete burnout in Chinese competitive swimmers: a cross-sectional study
Source: Research Square preprint supplement (doi:10.21203/rs.3.rs-6496771/v1), 2025-05-12
Supplement: Supplementary file 3 [file e76b7a63da8760928826854e.docx]

**Swimmer Health Survey Questionnaire​​**

Dear Athlete,

Hello! Welcome to the Athlete Health Survey. This questionnaire must be completed by you personally and cannot be filled out by someone else. It will take approximately ​​15 minutes​​ to complete.

The purpose of this survey is to help you better understand yourself and is ​​not​​ intended to evaluate your abilities. There are no right or wrong answers—please respond based on your own feelings and experiences. All information you provide will be used ​​solely for research purposes​​, and your personal details will remain ​​strictly confidential​​. Your honest and thoughtful responses are extremely valuable to us. The insights you share may help improve support for elite athletes in the future.

Please answer all questions truthfully based on your real thoughts and experiences.

Instructions:​​

Mark "✓" in the box "□" next to the answer that best fits your situation.

Fill in the blank "_______" with the appropriate information.

**​Section 1: Basic Information​​**

​​Age:​​ ______ years

​​Gender:​​ □ Male □ Female

​​Ethnicity:​​ □ Han Chinese □ Other ethnic group

​​Height:​​ ______ cm

​​Weight:​​ ______ kg

​​Residence:​​ □ Rural □ Suburban □ Urban

​​Only child?​​ □ Yes □ No

​​Current education level:​​

□ Primary school □ Middle school □ High school

□ College □ Bachelor’s degree □ Master’s degree or higher

**​Section 2: Athletic Background​​**

​​Your athlete level:​​

□ International Master □ National Master

□ First-Class Athlete □ Second-Class Athlete □ Third-Class Athlete

​​Your main swimming event:​​ ___________

​​Freestyle:​​ □ 50m □ 100m □ 200m □ 400m □ 800m □ 1500m

​​Backstroke:​​ □ 50m □ 100m □ 200m

​​Breaststroke:​​ □ 50m □ 100m □ 200m

​​Butterfly:​​ □ 50m □ 100m □ 200m

​​Individual Medley (IM):​​ □ 200m □ 400m

​​Years of specialized training:​​

□ <5 years □ 5–10 years □ >10 years

**Section 3: Screen time**

During the past week, what was your average daily screen time (mobile/tablet/computer/TV/video games etc.)?

□1 0 hours □2 0.5 hour/day □3 1 hour/day □4 2 hours/day □5 3 hours/day

□6 4 hours/day □7 5 hours/day □8 6 hours/day □9 7+ hours/day

**Section 4:** Eating Disorder

I feel extremely guilty after overeating

□1 always □2 mostly □3 often □4 sometimes □5 rarely □6 never

I am preoccupied with the desire to be thinner

□1 always □2 mostly □3 often □4 sometimes □5 rarely □6 never

I think that my stomach is too big

□1 always □2 mostly □3 often □4 sometimes □5 rarely □6 never

I feel satisfied with the shape of my body

□1 always □2 mostly □3 often □4 sometimes □5 rarely □6 never

My parents have expected excellence of me

□1 always □2 mostly □3 often □4 sometimes □5 rarely □6 never

As a child, I tried very hard to avoid disappointing my parents and teachers

□1 always □2 mostly □3 often □4 sometimes □5 rarely □6 never

Are you trying to lose weight now?

□Yes □No

Have you tried to lose weight?

□Yes □No

If yes, how many times have you tried to lose weight?

□1-2 times □3-5 times □>5 times

**Section 5: Athlete Sleep Screening Questionnaire**

During the recent past, how many hours of actual sleep did you get at night? (This may be different than the number of hours you spent in bed.)

□5-6h □6-7h □7-8h □8-9h □>9h

How satisfied/dissatisfied are you with the quality of your sleep?

□Very satisfied □Somewhat satisfied □Neutral □Somewhat dissatisfied □Very dissatisfied

During the recent past, how long has it usually taken you to fall asleep each night?

□≤15min □16-30min □31-60min □>60min

How often do you have trouble staying asleep?

□None □1-2 □3-4 □5-7

During the recent past, how often have you taken medicine to help you sleep (prescribed or over-the-counter)?

□None □1-2 □3-4 □5-7

**Section 6: Athletic Psychological Stress Questionnaire**

Please think back over the last four weeks and respond to each item considering how

often it applied to you.

It was difficult to be around teammates

□Never □Rarely □Sometimes □Often □Always

I found it difficult to do what I needed to do

□Never □Rarely □Sometimes □Often □Always

I was less motivated

□Never □Rarely □Sometimes □Often □Always

I was irritable, angry or aggressive

□Never □Rarely □Sometimes □Often □Always

I could not stop worrying about injury or my performance

□Never □Rarely □Sometimes □Often □Always

I found training more stressful

□Never □Rarely □Sometimes □Often □Always

I found it hard to cope with selection pressures

□Never □Rarely □Sometimes □Often □Always

I worried about life after sport

□Never □Rarely □Sometimes □Often □Always

I needed alcohol or other substances to relax

□Never □Rarely □Sometimes □Often □Always

I took unusual risks off-field

□Never □Rarely □Sometimes □Often □Always

**Section 7: Coping Scale for Chinese Athletes**

Indicate how frequently you use these coping strategies:

Solve problems step-by-step

□Never □Occasionally □Moderately □Often □Always

Actively use mental skills to relieve stress

□Never □Occasionally □Moderately □Often □Always

Think about things I enjoy

□Never □Occasionally □Moderately □Often □Always

Focus on the task at hand

□Never □Occasionally □Moderately □Often □Always

Try harder

□Never □Occasionally □Moderately □Often □Always

Wait and see how things develop

□Never □Occasionally □Moderately □Often □Always

Analyze problems and develop solutions

□Never □Occasionally □Moderately □Often □Always

Create and follow action plans to overcome difficulties

□Never □Occasionally □Moderately □Often □Always

Calm myself down

□Never □Occasionally □Moderately □Often □Always

Remove myself from stressful situations

□Never □Occasionally □Moderately □Often □Always

Do other enjoyable activities

□Never □Occasionally □Moderately □Often □Always

Avoid thinking about stressful situations

□Never □Occasionally □Moderately □Often □Always

"The boat will straighten itself when it reaches the bridge" (Address problems when they arise)

□Never □Occasionally □Moderately □Often □Always

Minimize emotional reactions

□Never □Occasionally □Moderately □Often □Always

Maintain a lighthearted mood

□Never □Occasionally □Moderately □Often □Always

Cultivate positive emotions

□Never □Occasionally □Moderately □Often □Always

"Stepping back widens the view" (Gain perspective by distancing)

□Never □Occasionally □Moderately □Often □Always

Regulate my emotions

□Never □Occasionally □Moderately □Often □Always

Take vacations to forget difficulties

□Never □Occasionally □Moderately □Often □Always

"Winning/losing is routine in sports" (Accept competitive outcomes)

□Never □Occasionally □Moderately □Often □Always

Avoid confronting stressful problems

□Never □Occasionally □Moderately □Often □Always

Submit to fate ("It's my destiny")

□Never □Occasionally □Moderately □Often □Always

Maintain emotional control

□Never □Occasionally □Moderately □Often □Always

"Everything happens for a reason" (Accept things naturally)

□Never □Occasionally □Moderately □Often □Always

**Section 8: Athlete Burnout Questionnaire**

I am performing many worthwhile things in the sport

□Never □Rarely □Occasionally □Frequently □Always

I feel so tired from the training that I do not find the energy to do other things.

□Never □Rarely □Occasionally □Frequently □Always

The effort I need to put into sport would be better used in more productive activities

□Never □Rarely □Occasionally □Frequently □Always

I feel extremely tired from the sport participation

□Never □Rarely □Occasionally □Frequently □Always

I am not reaching important goals with the sport

□Never □Rarely □Occasionally □Frequently □Always

I am not as concerned about my sport performance as I used to be

□Never □Rarely □Occasionally □Frequently □Always

I am not performing up to my ability in the sport

□Never □Rarely □Occasionally □Frequently □Always

I feel physically and emotionally worn out by sport

□Never □Rarely □Occasionally □Frequently □Always

I am not as interested in sport as I used to be

□Never □Rarely □Occasionally □Frequently □Always

I am physically exhausted by sport

□Never □Rarely □Occasionally □Frequently □Always

I am not as worried about being successful at sports as I used to be.

□Never □Rarely □Occasionally □Frequently □Always

I feel exhausted by the physical and mental demands of the sport

□Never □Rarely □Occasionally □Frequently □Always

It seems that no matter what I do, I don’t perform as well as I should

□Never □Rarely □Occasionally □Frequently □Always

I feel successful at sports

□Never □Rarely □Occasionally □Frequently □Always

I have negative feelings and thoughts towards my sport activity

□Never □Rarely □Occasionally □Frequently □Always
